# Supplementary material
Source: MDPI journal article supplement (https://www.mdpi.com/2073-4395/14/2/373)
Supplement: s1 [file s1]

**Figure S1:** Change in seed coat brightness (CIE  $L^*$ ) in four red lentil cultivars stored at two moisture and four temperatures level for 360 days.

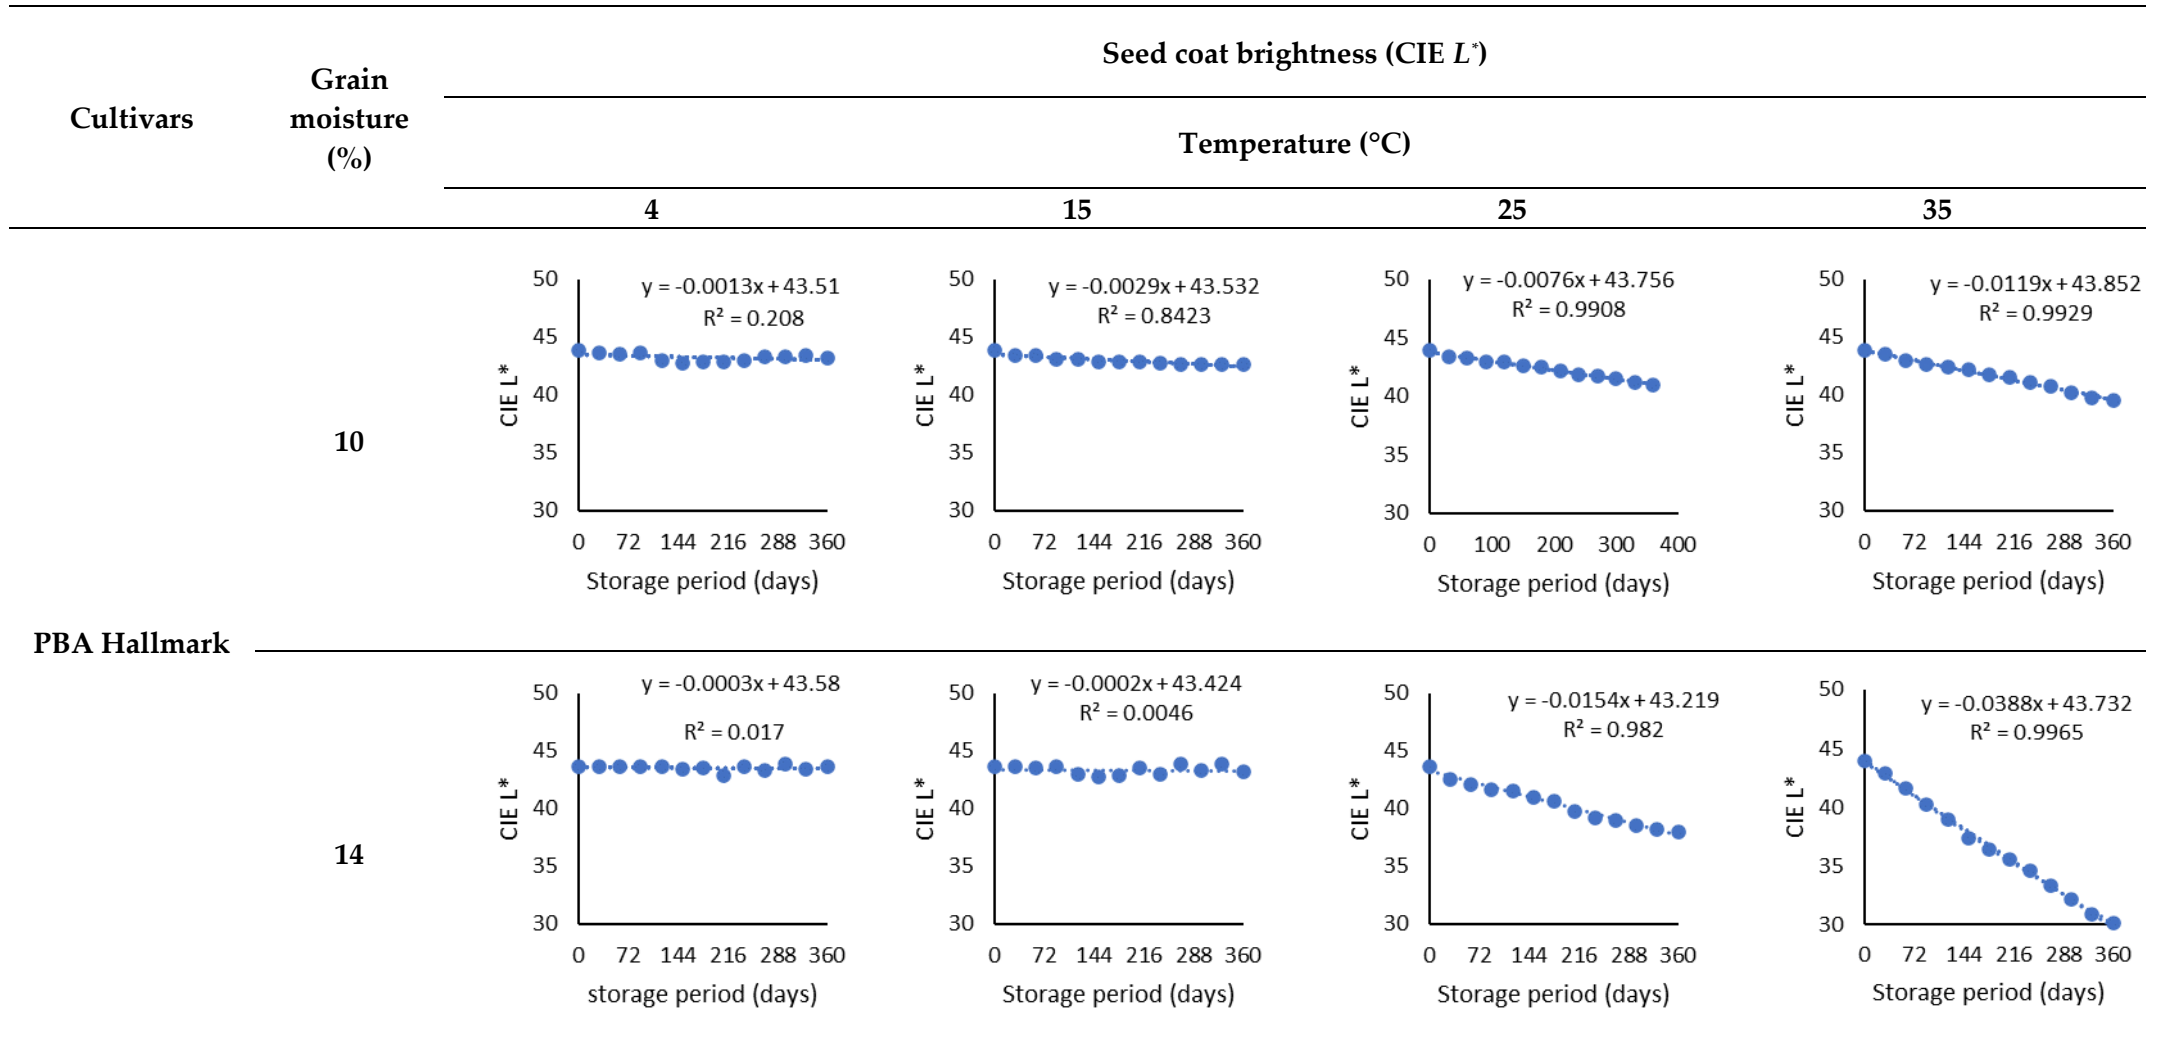

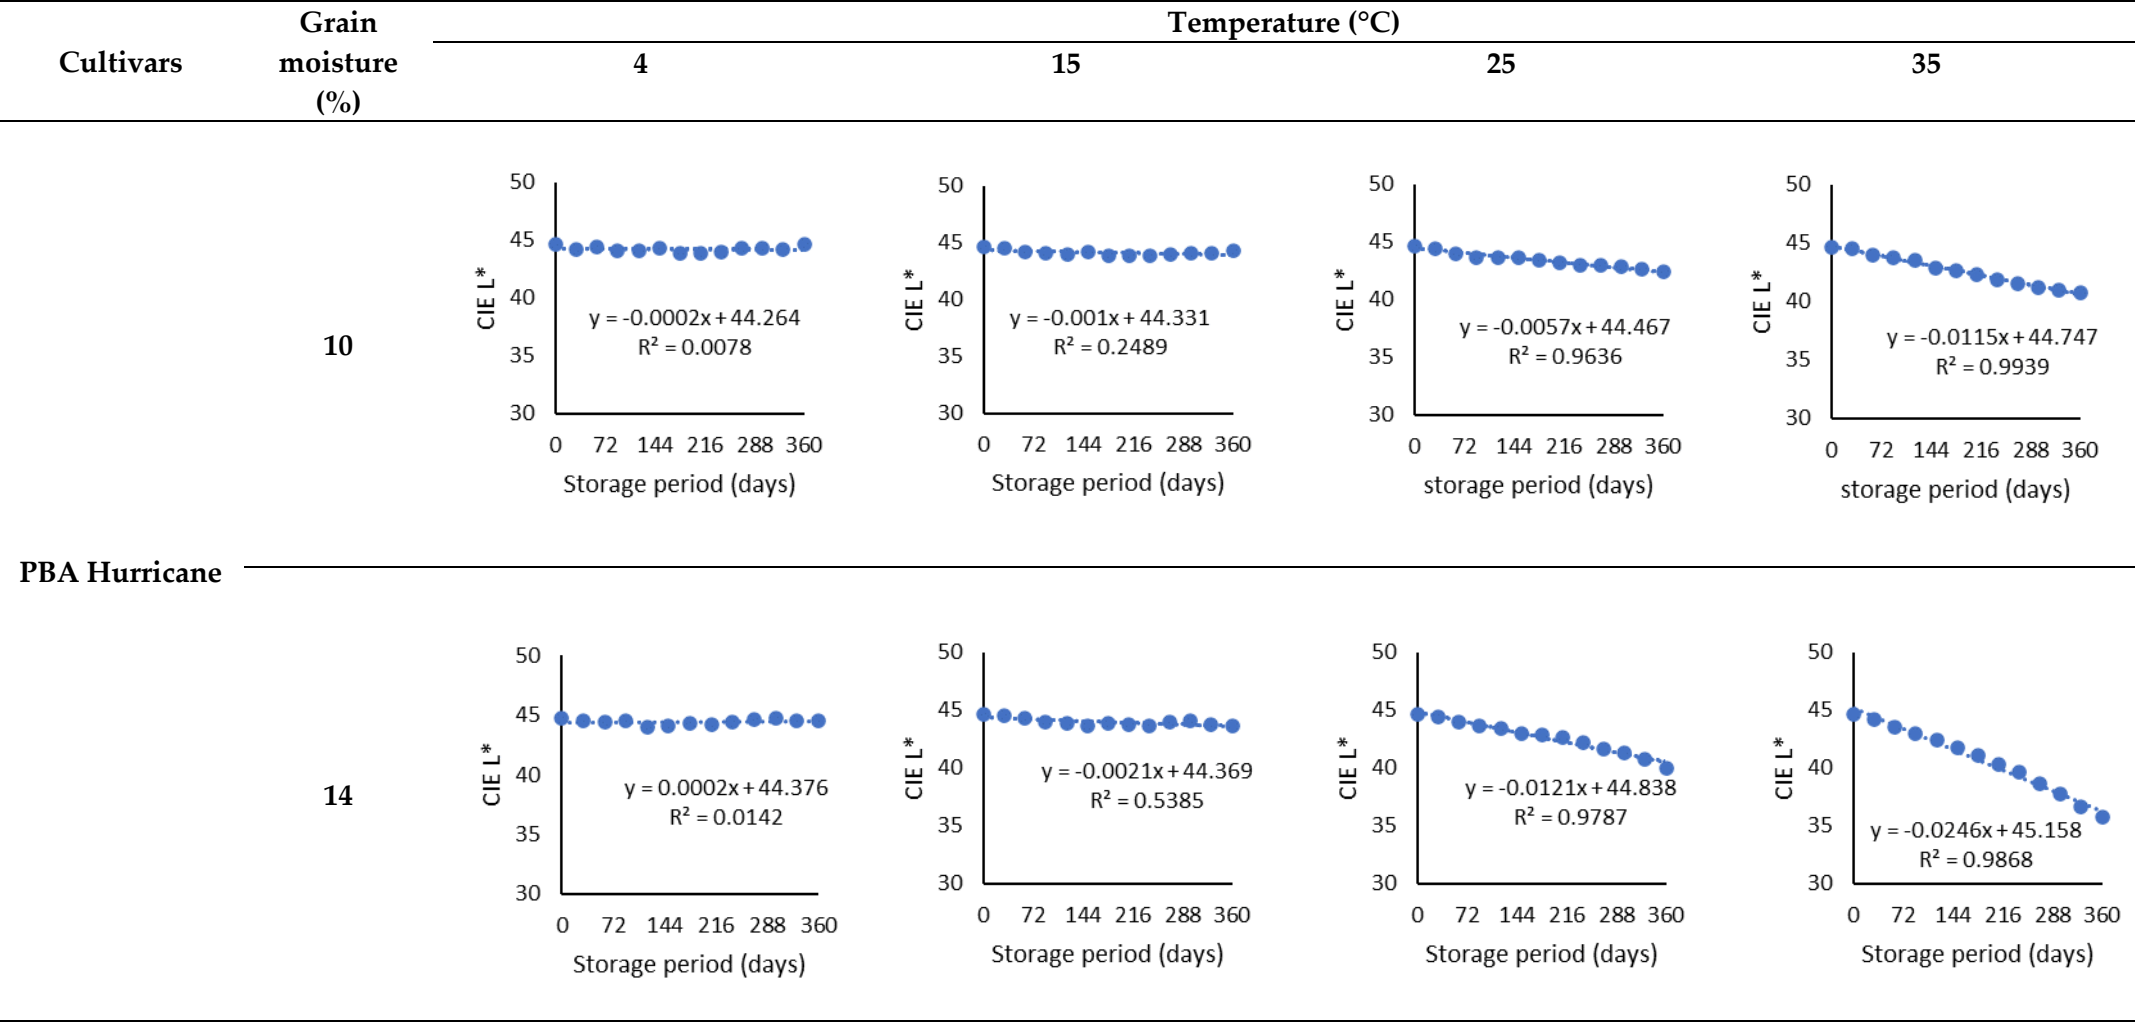

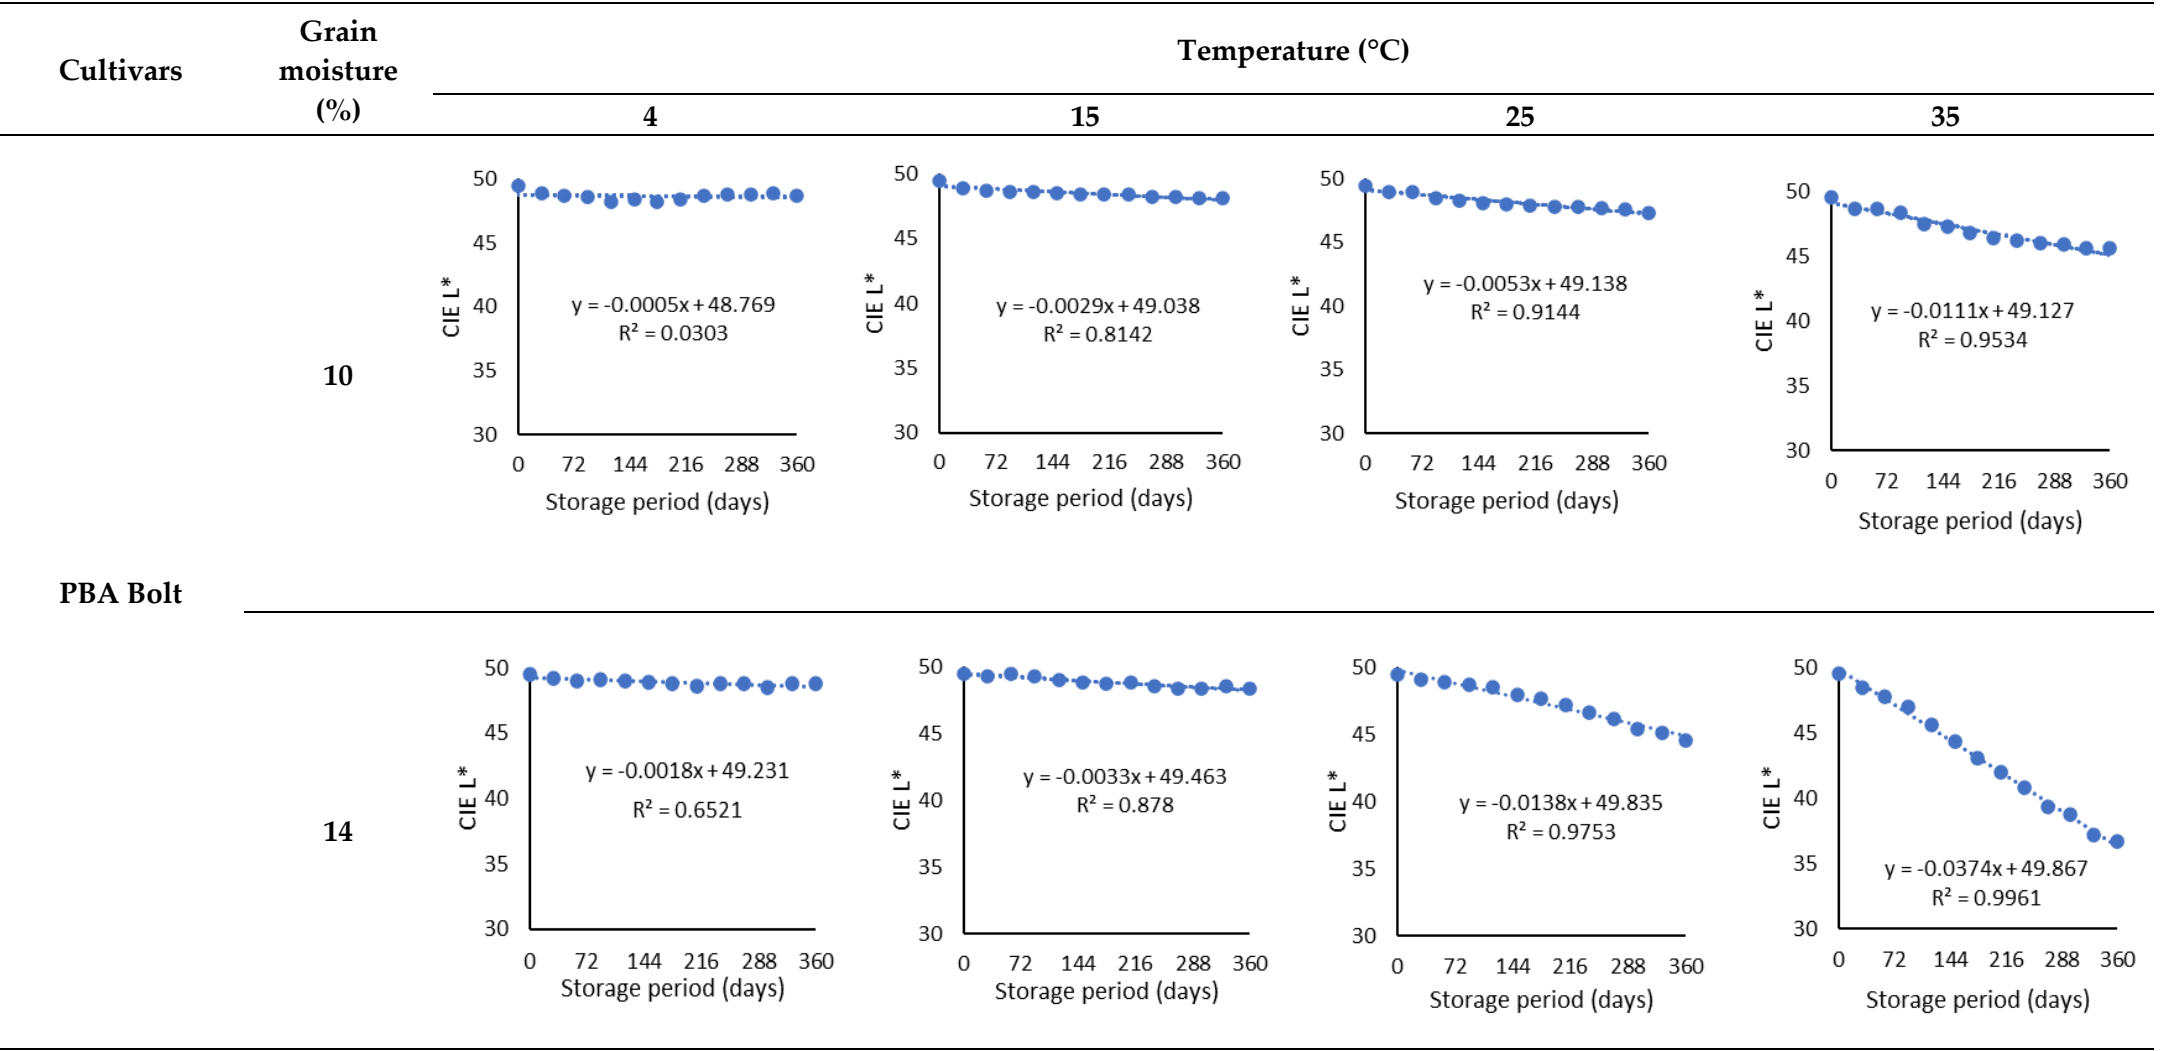

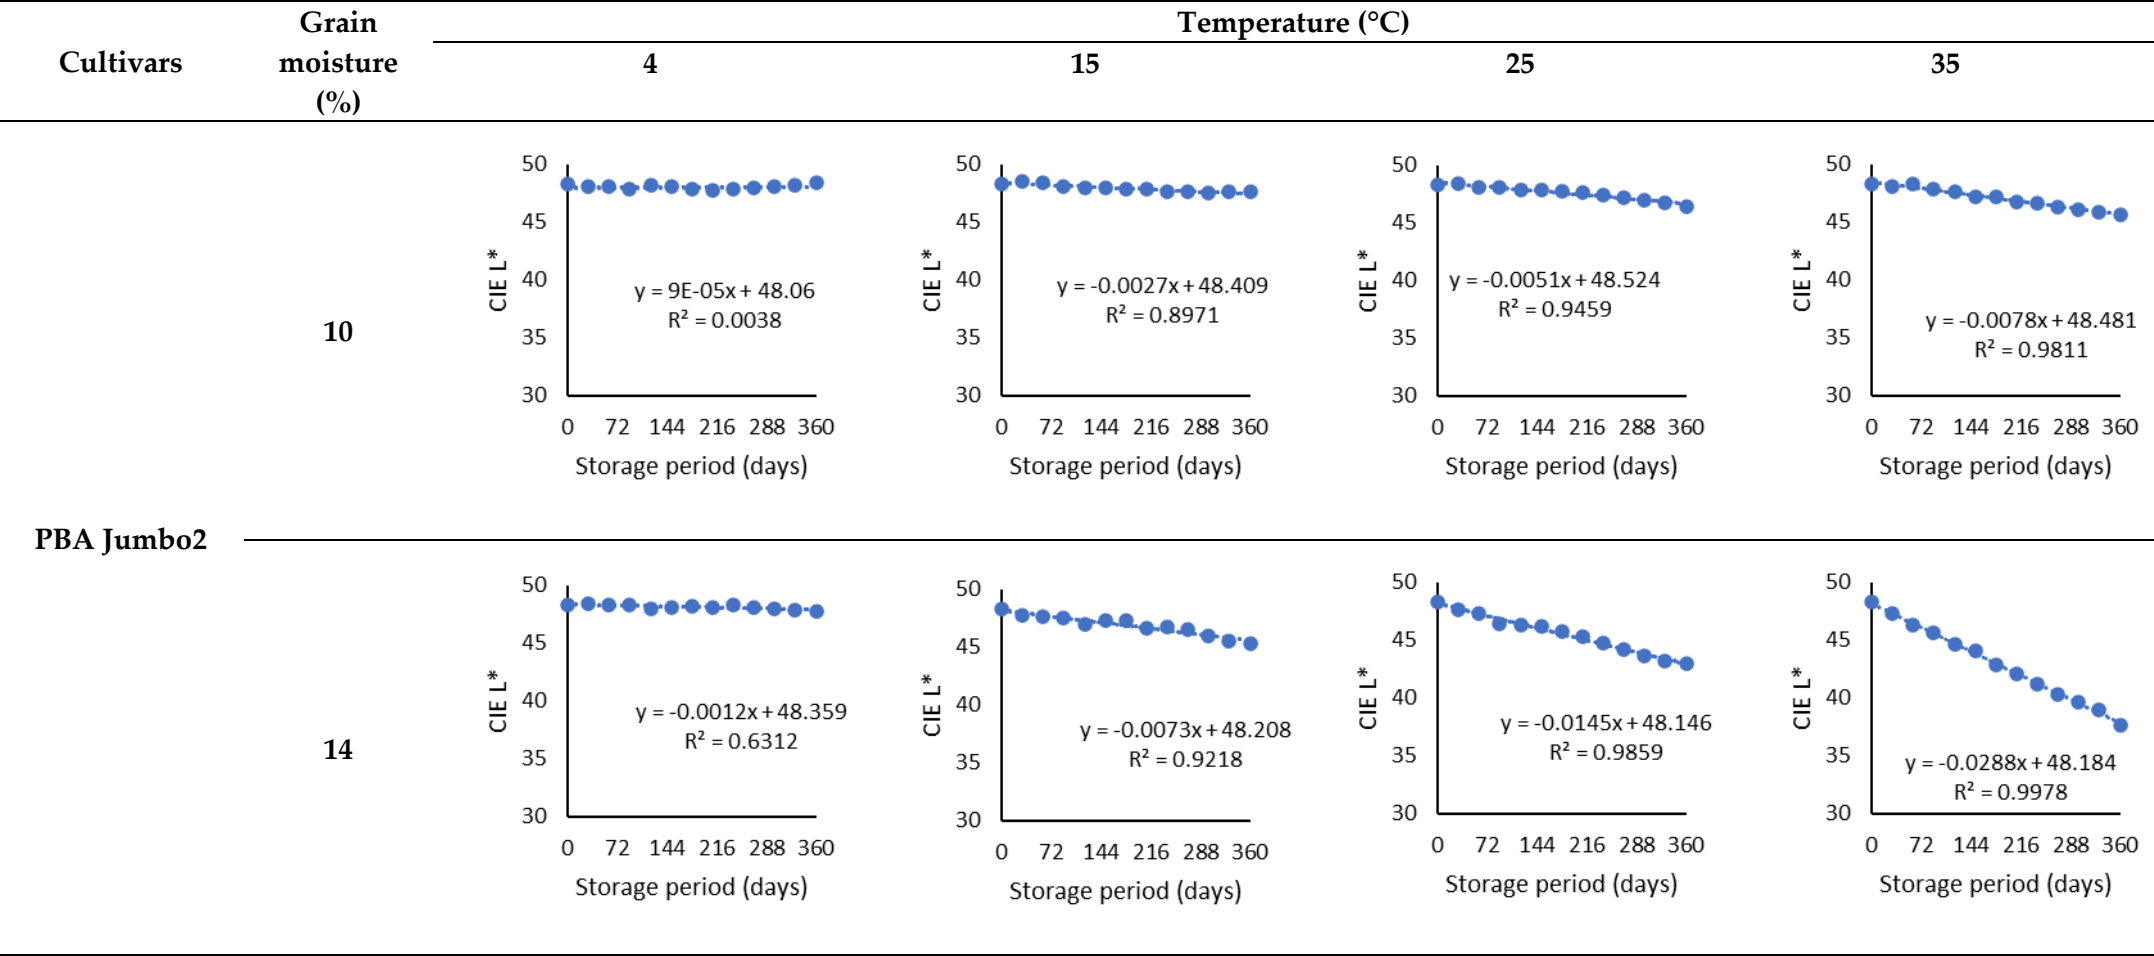

**Figure S2:** Change in seed coat redness (CIE  $a^*$ ) in four red lentil cultivars stored at two moisture and four temperatures level for 360 days.

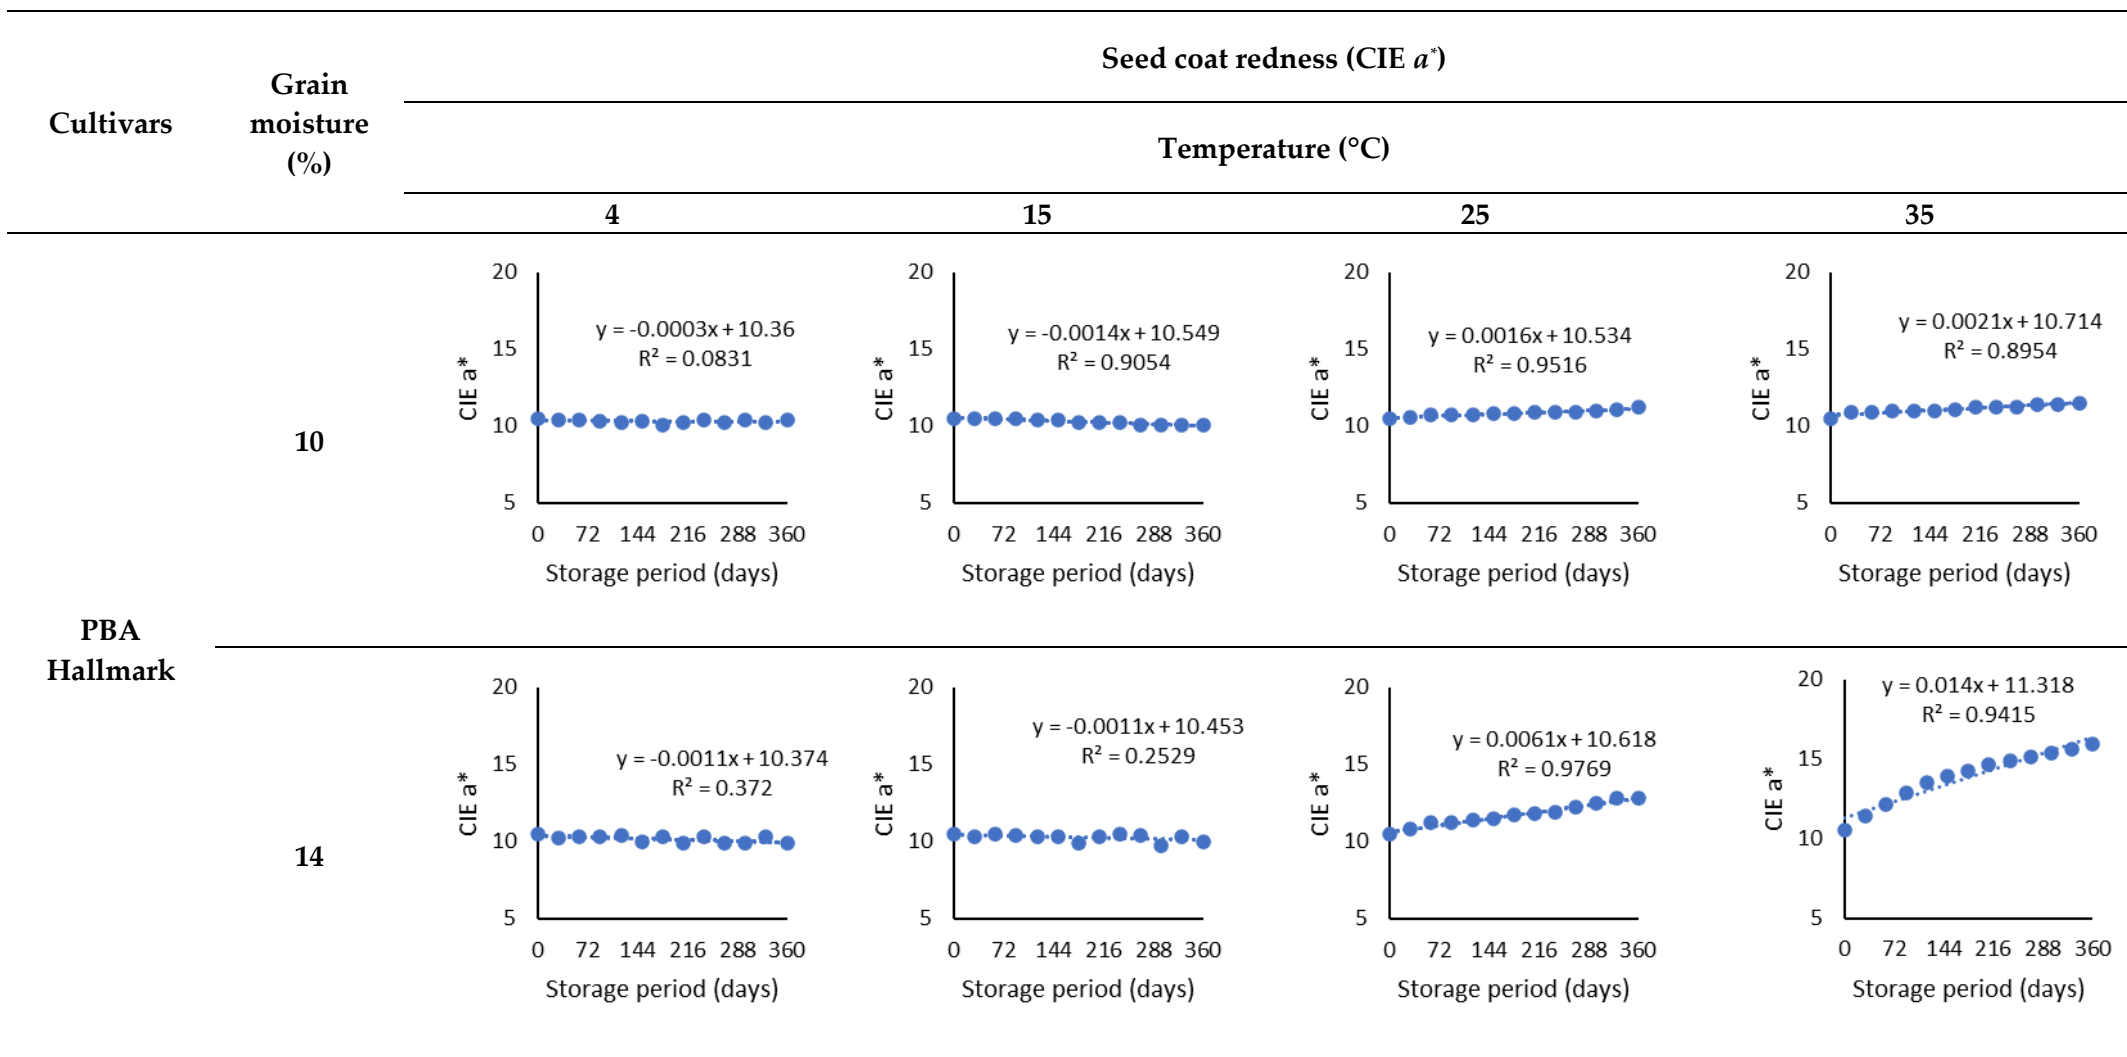

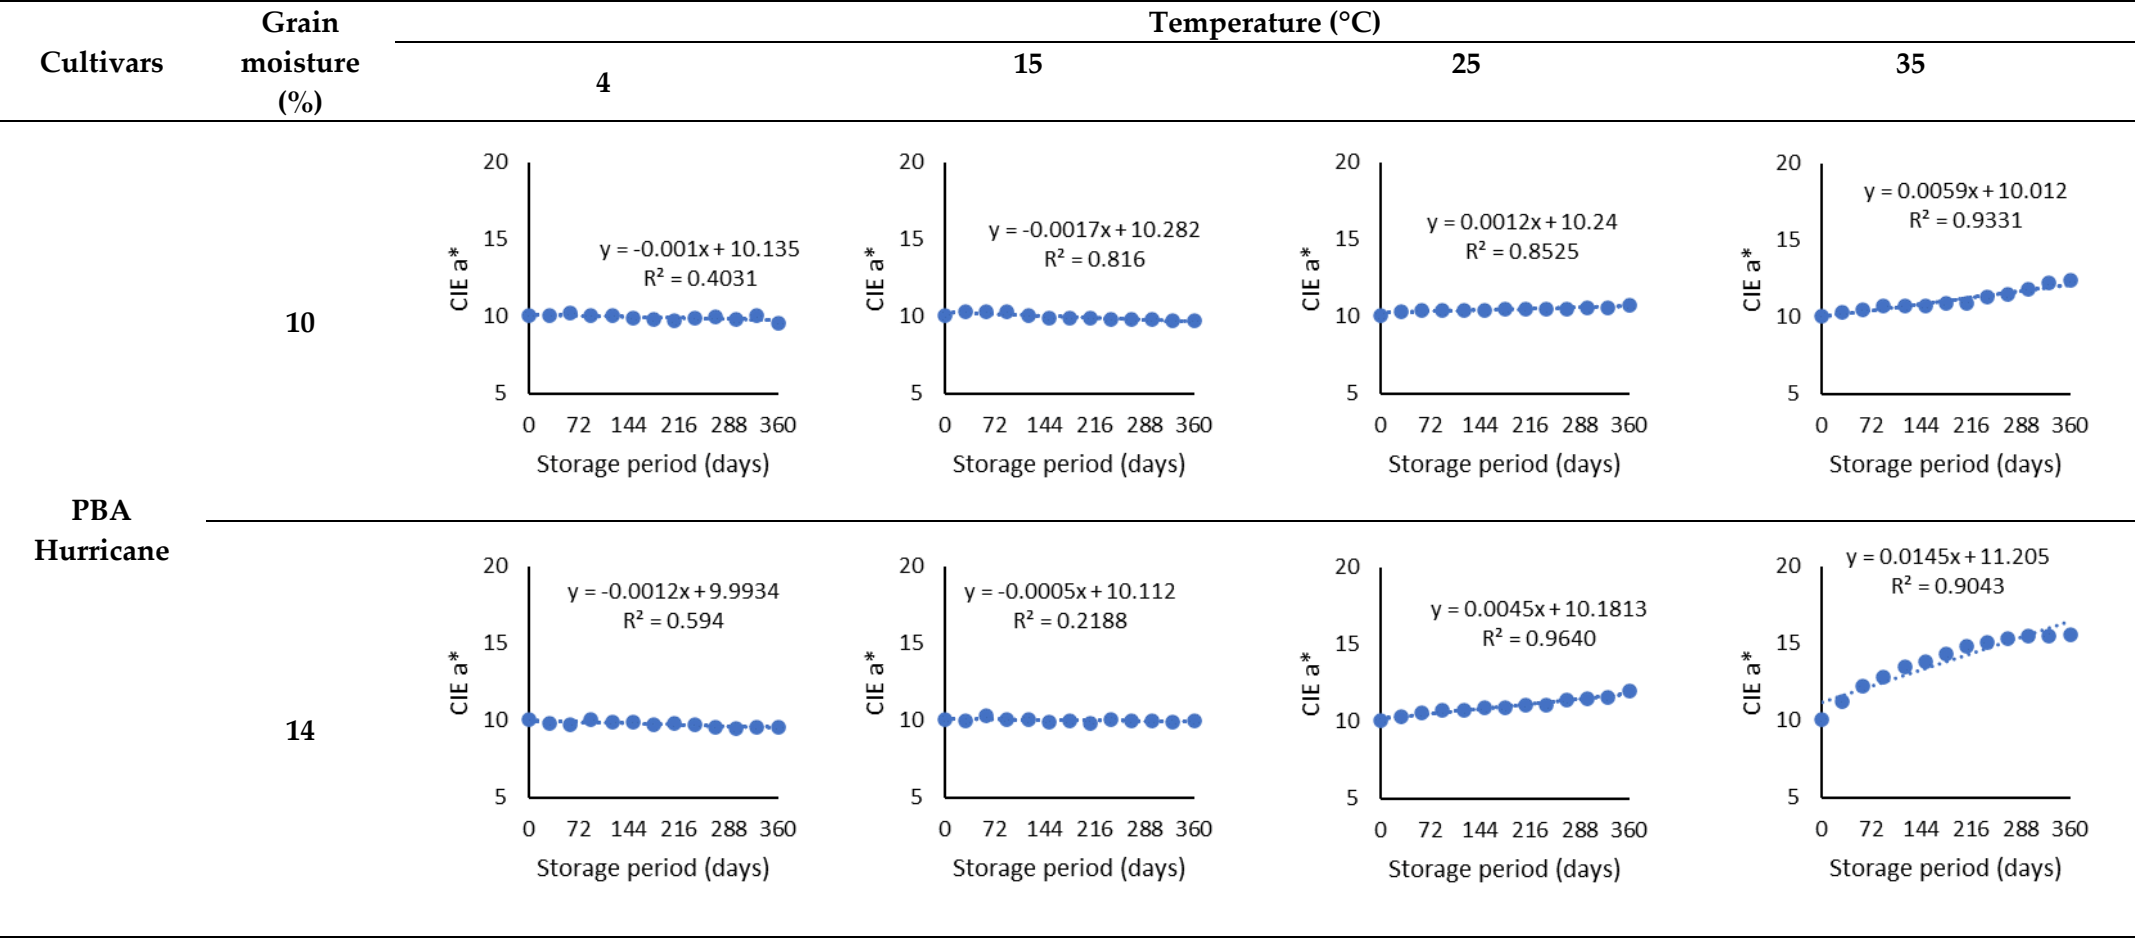

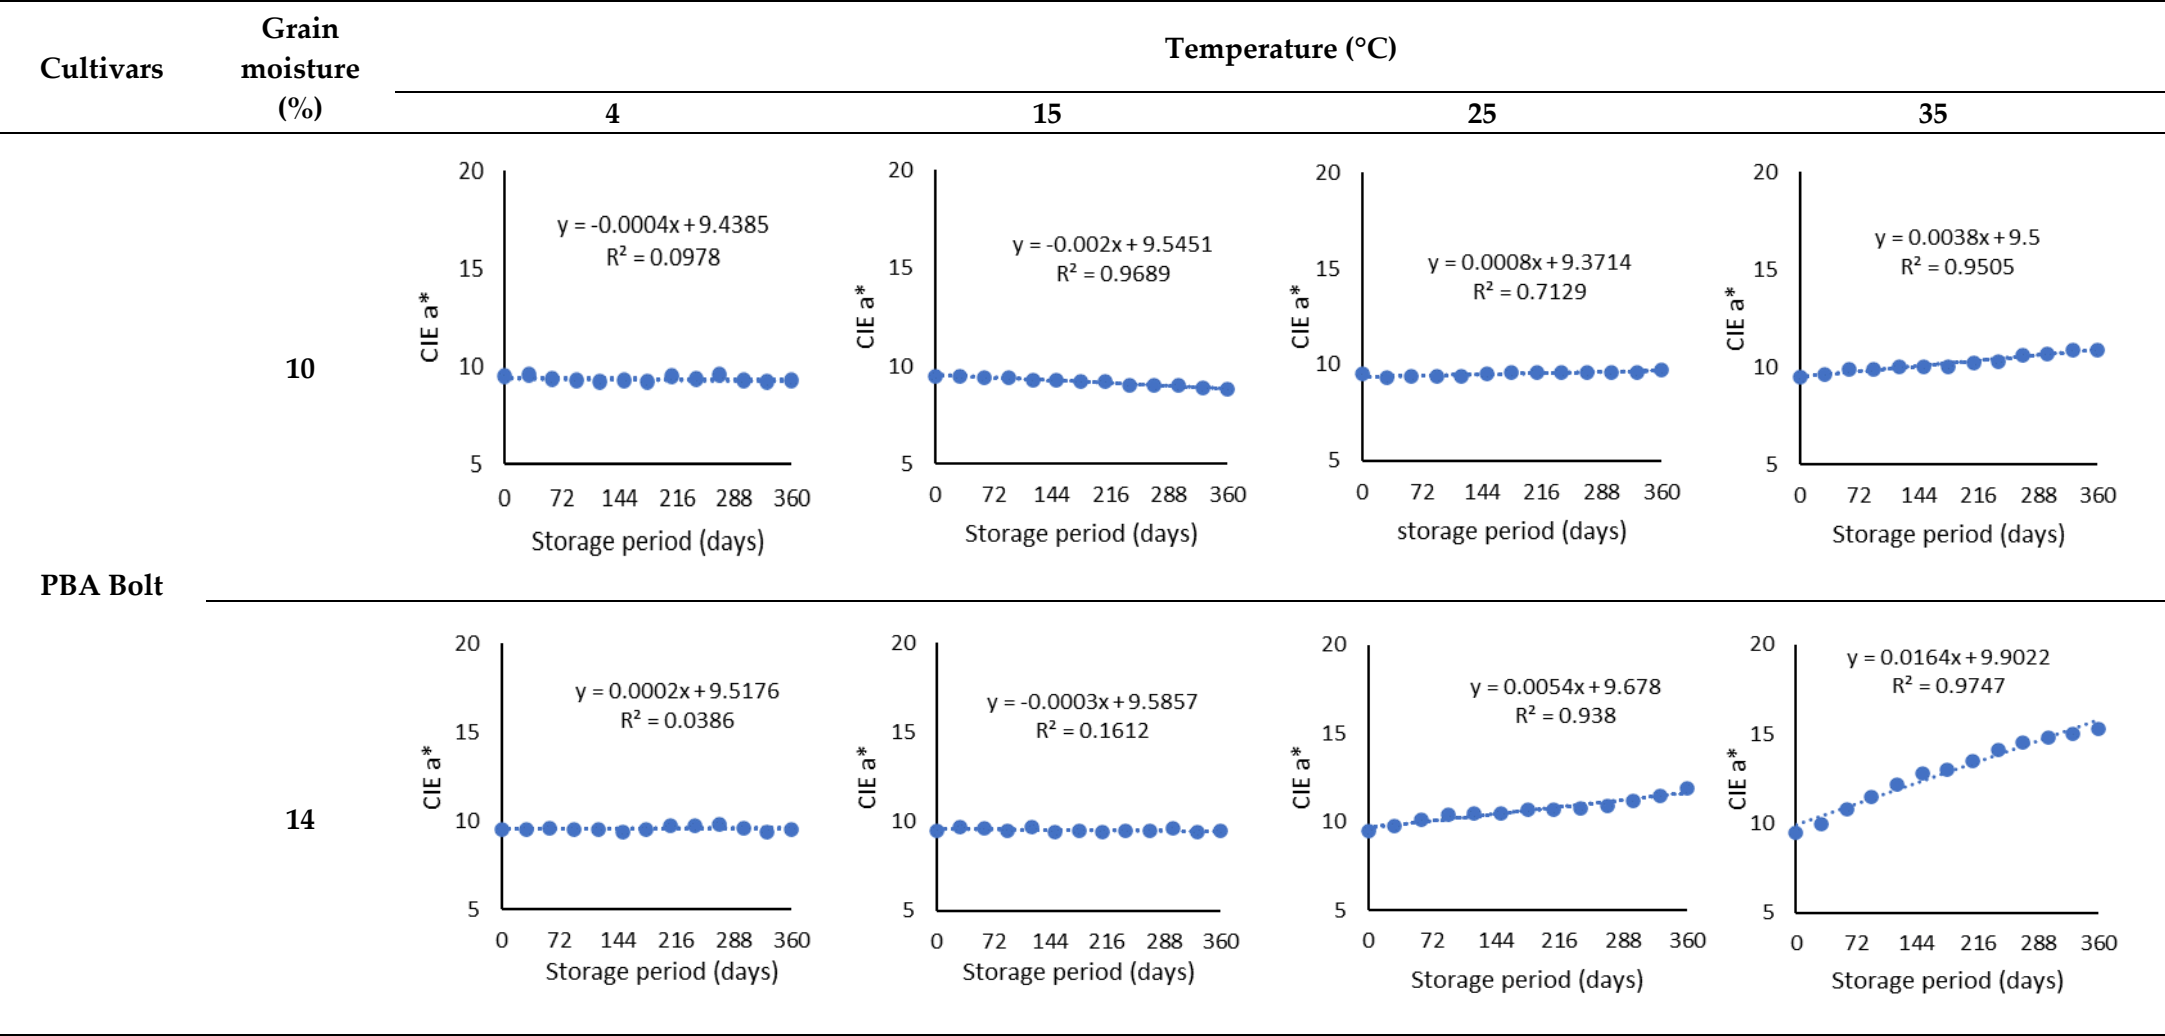

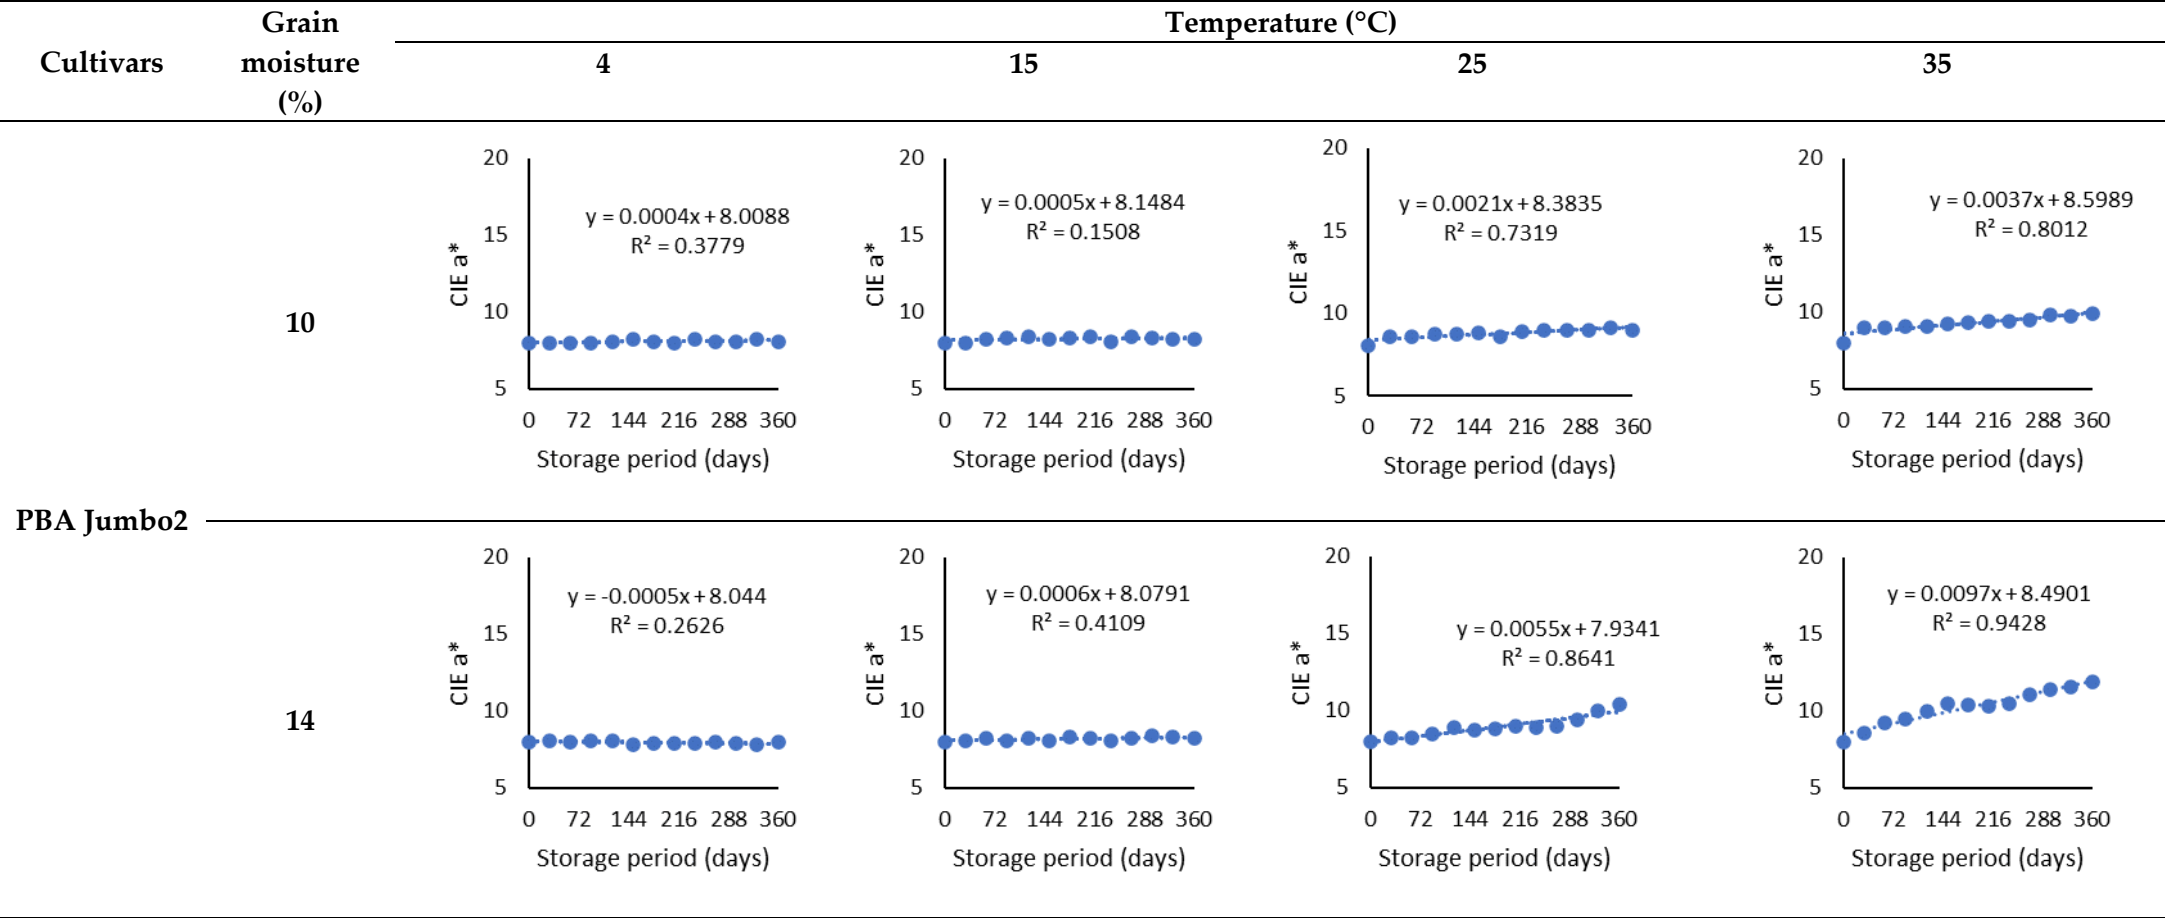



**Figure S3:** Change in seed coat yellowness (CIE  $b^*$ ) in four red lentil cultivars stored at two moisture and four temperatures level for 360 days.

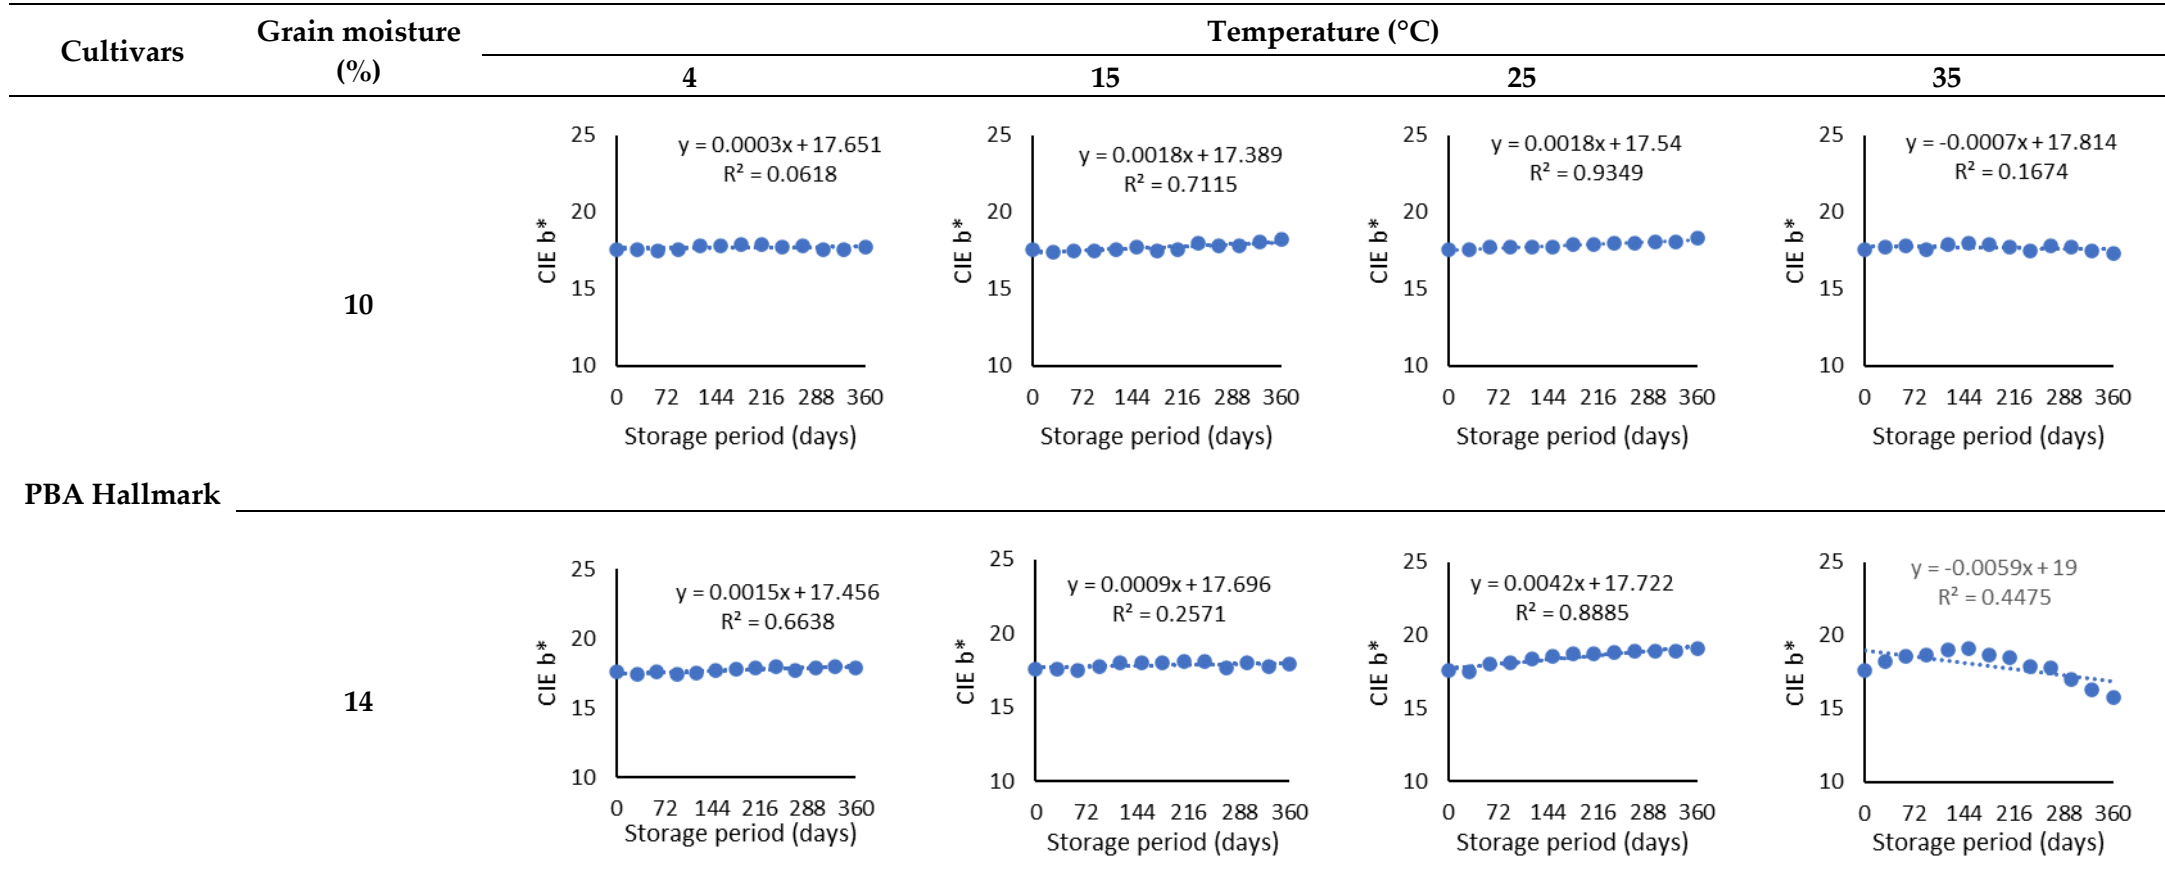

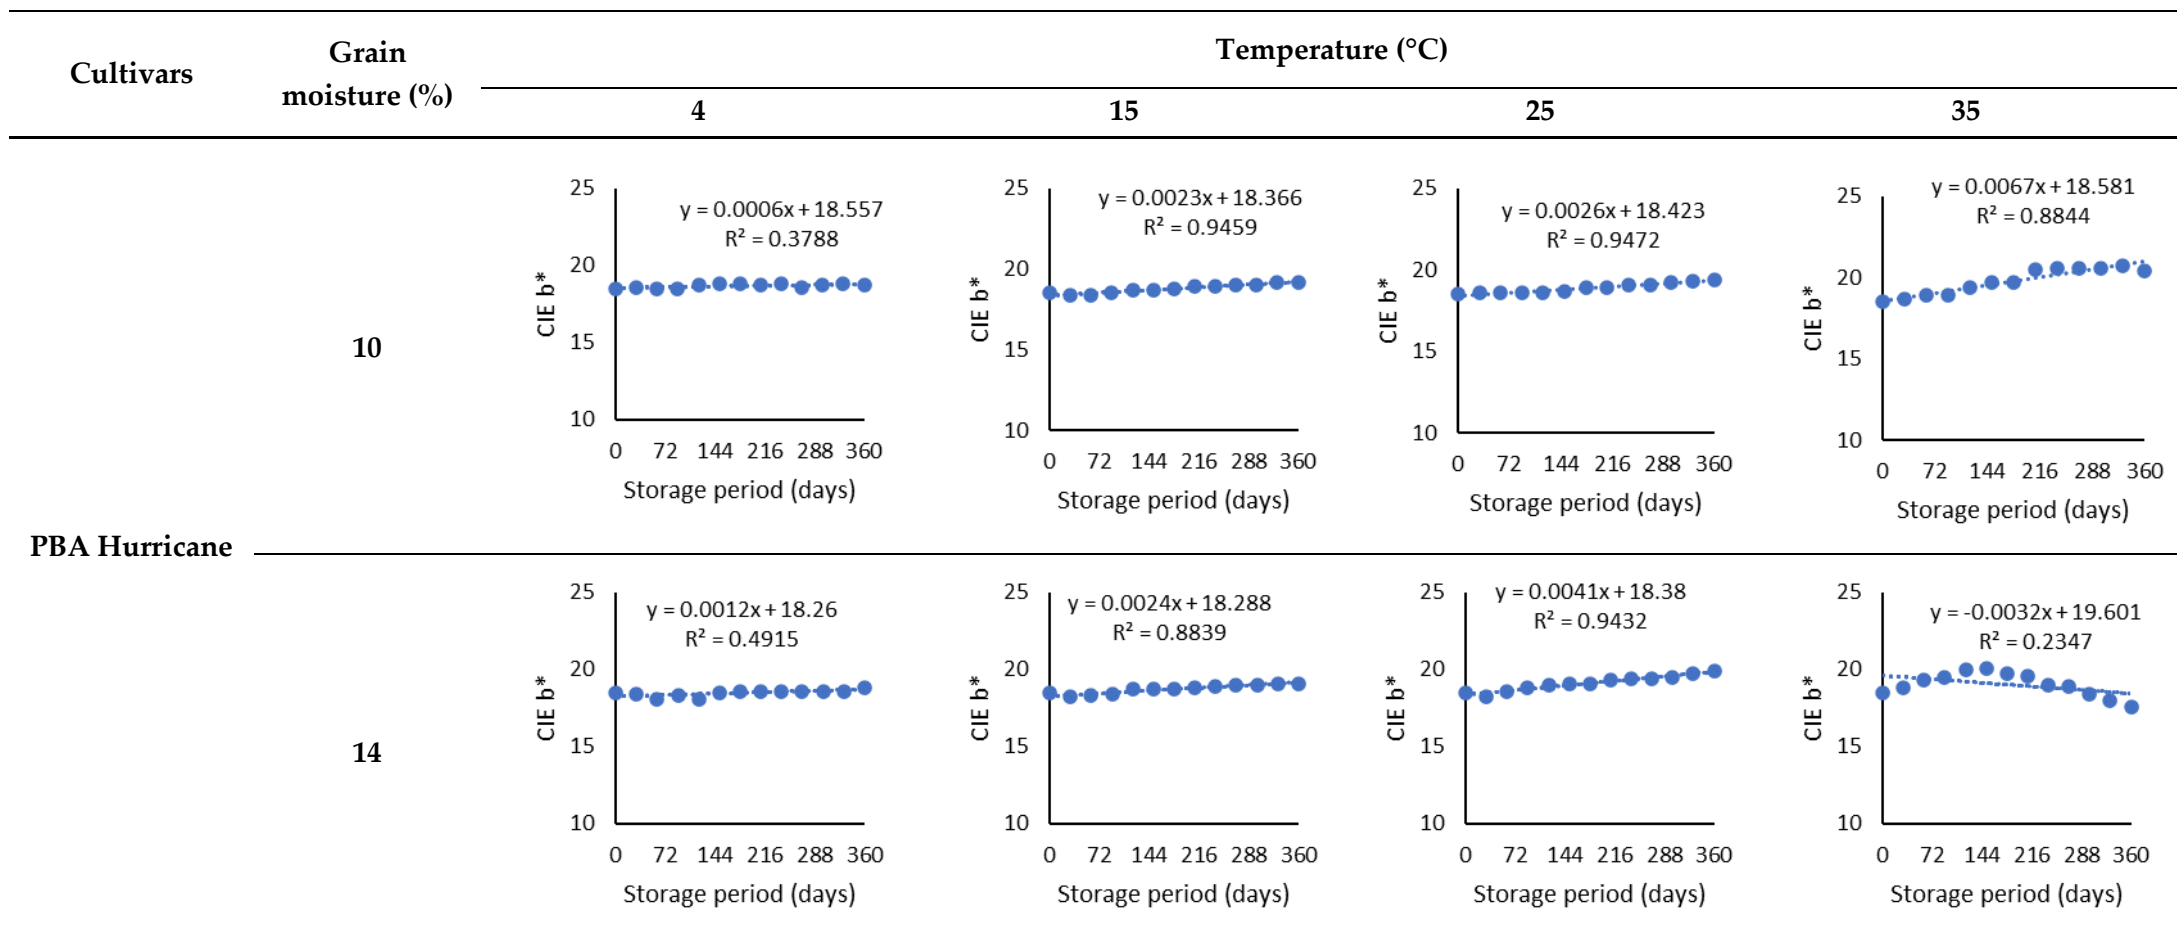

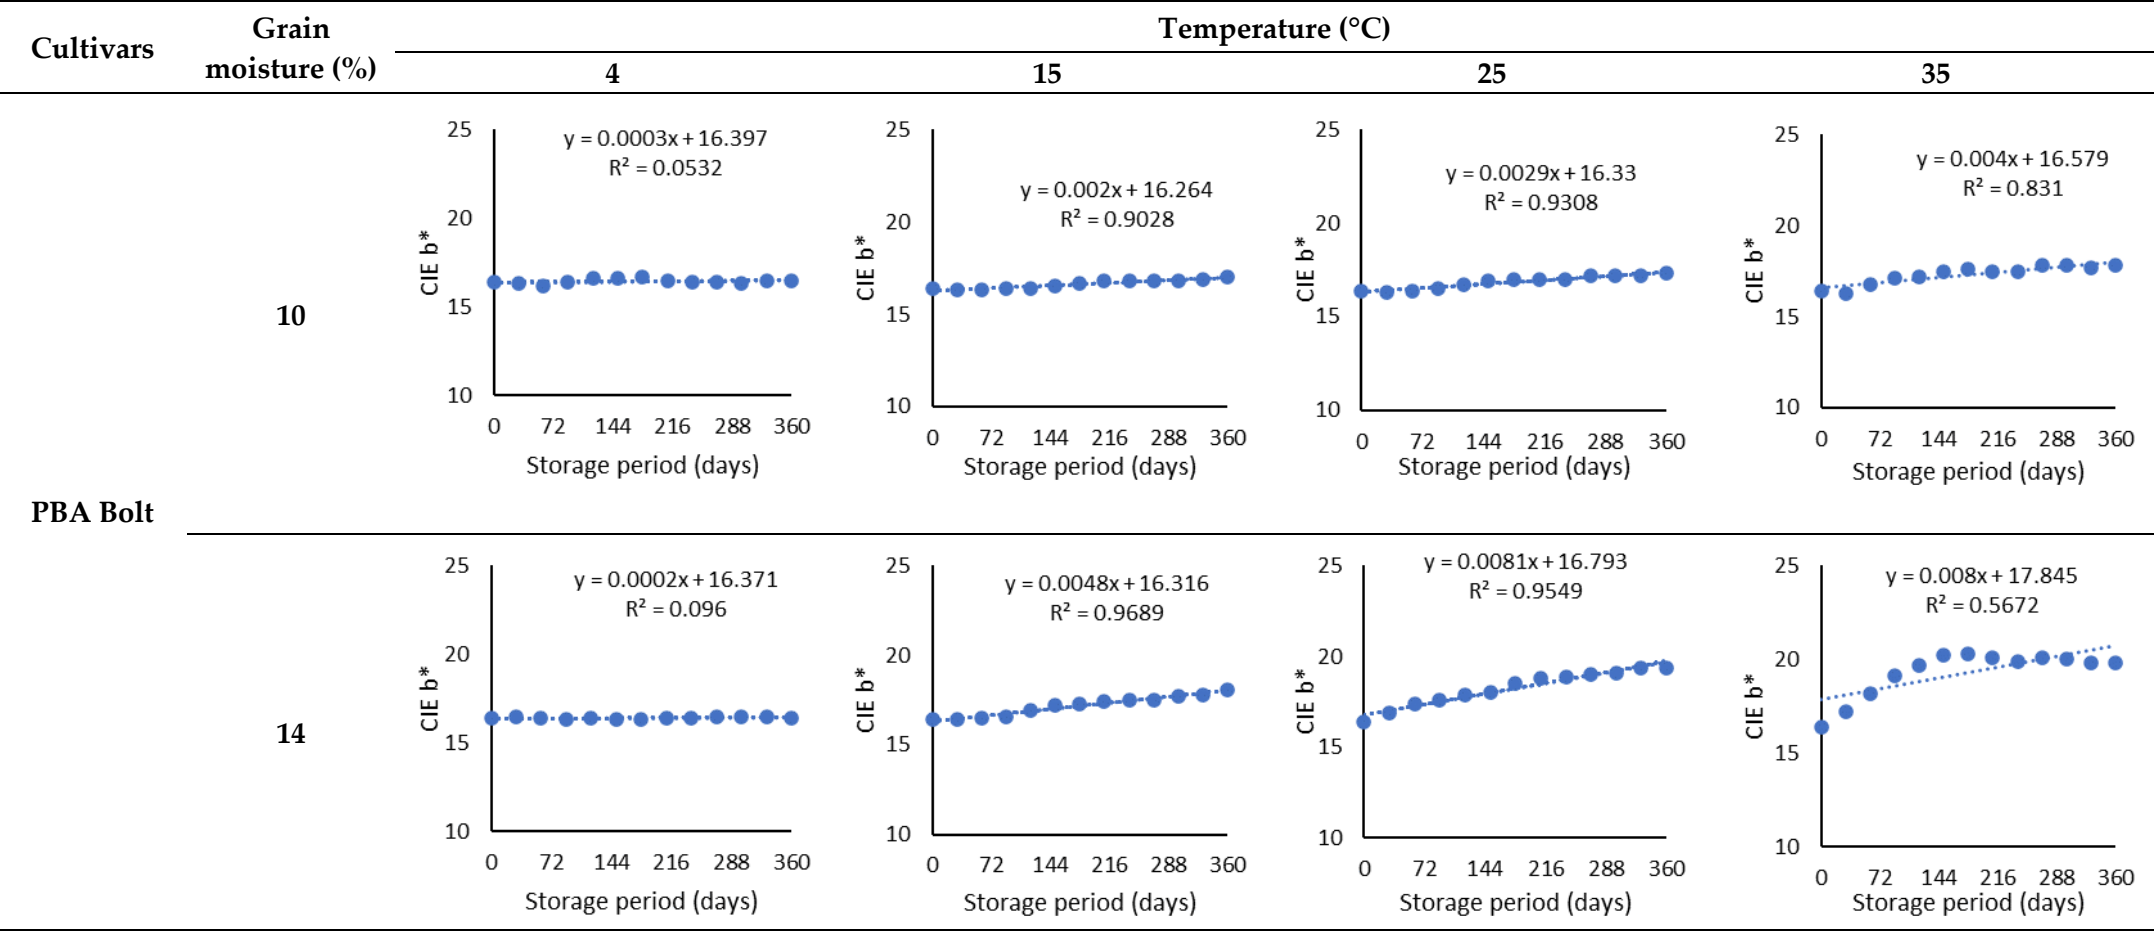

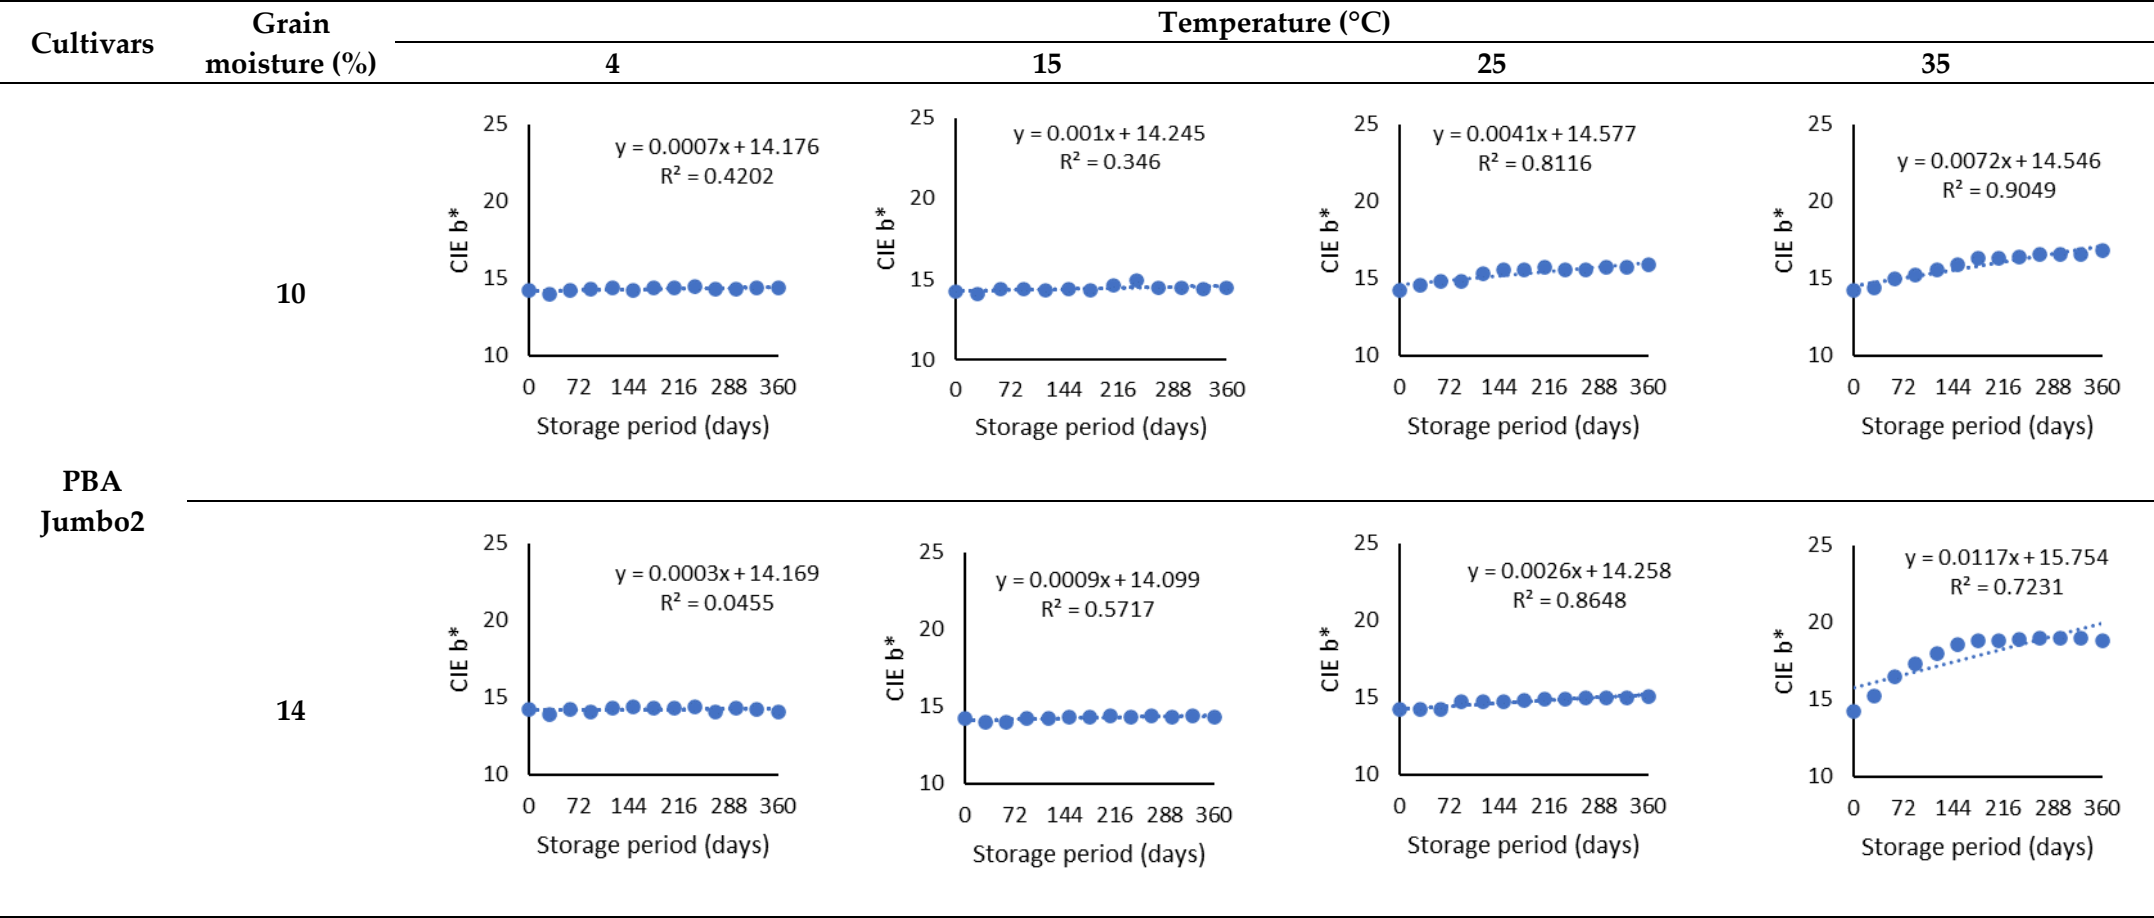

**Table S1:** Daily average temperatures recorded over the period of 150 days at different points at the top level of the silo.

| Days after storage | Temperature (°C) Top level |         |         |         |         |         |         |         |         |          |          |
|--------------------|----------------------------|---------|---------|---------|---------|---------|---------|---------|---------|----------|----------|
|                    | point 1                    | Point 2 | point 3 | point 4 | point 5 | point 6 | point 7 | point 8 | point 9 | point 10 | point 11 |
| 0                  | 29.50                      | 29.50   | 29.50   | 29.50   | 29.50   | 29.50   | 29.50   | 29.50   | 29.50   | 29.50    | 29.50    |
| 1                  | 24.50                      | 23.89   | 27.86   | 27.60   | 28.11   | 28.92   | 25.92   | 22.90   | 22.86   | 28.25    | 26.30    |
| 2                  | 25.46                      | 24.41   | 26.51   | 27.59   | 28.10   | 28.70   | 25.85   | 23.85   | 23.43   | 27.94    | 26.30    |
| 3                  | 25.18                      | 23.90   | 26.46   | 27.54   | 28.10   | 28.56   | 25.80   | 24.03   | 23.26   | 27.65    | 26.02    |
| 4                  | 24.21                      | 22.64   | 26.15   | 27.48   | 28.10   | 28.39   | 25.66   | 23.64   | 22.04   | 27.32    | 25.82    |
| 5                  | 23.25                      | 22.28   | 26.14   | 27.33   | 28.01   | 28.26   | 25.46   | 23.18   | 21.77   | 27.27    | 25.21    |
| 6                  | 24.52                      | 22.90   | 25.78   | 27.15   | 27.91   | 28.08   | 25.30   | 23.01   | 22.00   | 27.17    | 24.60    |
| 7                  | 26.23                      | 24.60   | 25.32   | 26.83   | 27.88   | 27.91   | 25.20   | 23.31   | 23.12   | 27.03    | 24.55    |
| 8                  | 25.18                      | 24.21   | 25.11   | 26.77   | 27.88   | 27.77   | 25.20   | 23.72   | 23.34   | 26.55    | 24.00    |
| 9                  | 23.87                      | 22.41   | 24.22   | 26.17   | 27.82   | 27.67   | 25.11   | 23.48   | 21.97   | 26.55    | 25.15    |
| 10                 | 21.67                      | 20.88   | 22.45   | 24.91   | 27.67   | 27.57   | 24.88   | 22.68   | 20.69   | 26.45    | 23.54    |
| 11                 | 20.18                      | 20.03   | 20.33   | 24.78   | 27.34   | 27.46   | 24.56   | 22.07   | 20.13   | 25.67    | 22.17    |
| 12                 | 19.95                      | 19.57   | 20.32   | 24.40   | 26.93   | 27.31   | 23.80   | 21.52   | 19.66   | 24.17    | 21.22    |
| 13                 | 20.38                      | 19.68   | 21.08   | 24.10   | 26.50   | 27.13   | 24.26   | 21.22   | 19.58   | 23.80    | 21.35    |
| 14                 | 19.54                      | 18.83   | 20.25   | 23.84   | 26.13   | 26.94   | 23.95   | 20.81   | 18.86   | 23.18    | 20.46    |
| 15                 | 19.29                      | 18.64   | 19.94   | 23.73   | 25.76   | 26.74   | 23.64   | 20.42   | 18.64   | 22.37    | 19.88    |
| 16                 | 18.22                      | 17.57   | 18.86   | 23.60   | 24.66   | 26.53   | 23.32   | 19.94   | 17.74   | 21.77    | 19.02    |
| 17                 | 18.95                      | 17.28   | 20.62   | 23.18   | 25.43   | 25.30   | 23.00   | 19.30   | 16.93   | 21.17    | 18.53    |
| 18                 | 20.03                      | 17.92   | 22.13   | 22.95   | 25.11   | 26.27   | 22.58   | 18.72   | 16.78   | 22.16    | 19.61    |
| 19                 | 21.01                      | 18.51   | 23.51   | 22.82   | 24.92   | 26.00   | 22.18   | 18.55   | 17.10   | 22.92    | 20.34    |
| 20                 | 21.64                      | 18.83   | 24.45   | 22.80   | 24.80   | 25.70   | 21.86   | 18.59   | 17.42   | 23.46    | 20.71    |
| 21                 | 20.40                      | 19.14   | 21.65   | 22.24   | 24.79   | 25.42   | 21.64   | 18.80   | 18.04   | 24.14    | 21.13    |
| 22                 | 18.91                      | 18.35   | 19.46   | 22.20   | 24.69   | 25.13   | 21.48   | 18.92   | 17.90   | 22.87    | 19.89    |
| 23                 | 18.52                      | 17.84   | 19.20   | 22.04   | 24.50   | 24.89   | 21.37   | 18.81   | 17.54   | 21.79    | 19.07    |
| 24                 | 17.61                      | 16.81   | 18.41   | 21.40   | 24.21   | 24.67   | 21.24   | 18.49   | 16.82   | 21.07    | 18.20    |
| 25                 | 16.96                      | 16.26   | 17.66   | 20.80   | 23.92   | 24.50   | 21.06   | 18.06   | 16.28   | 20.19    | 17.45    |
| 26                 | 17.64                      | 16.89   | 18.39   | 20.58   | 23.58   | 24.29   | 20.79   | 17.75   | 16.33   | 19.63    | 17.22    |
| 27                 | 17.84                      | 17.16   | 18.52   | 20.52   | 23.24   | 24.07   | 20.55   | 17.74   | 16.74   | 19.45    | 17.54    |
| 28                 | 18.86                      | 18.01   | 19.72   | 20.72   | 22.91   | 23.81   | 20.36   | 17.92   | 17.37   | 19.56    | 18.34    |
| 29                 | 19.28                      | 18.07   | 20.49   | 21.07   | 22.70   | 23.56   | 20.23   | 18.09   | 17.40   | 20.34    | 18.92    |
| 30                 | 17.71                      | 17.60   | 17.82   | 20.79   | 22.55   | 23.32   | 20.16   | 18.19   | 17.37   | 20.34    | 18.46    |
| 31                 | 17.62                      | 16.63   | 18.60   | 20.36   | 22.39   | 23.10   | 20.07   | 17.92   | 16.53   | 19.47    | 17.50    |
| 32                 | 16.99                      | 16.26   | 17.72   | 20.06   | 22.19   | 22.88   | 20.02   | 17.70   | 16.36   | 19.29    | 17.28    |
| 33                 | 18.13                      | 17.17   | 19.10   | 20.16   | 22.07   | 22.78   | 19.92   | 17.62   | 16.59   | 19.11    | 17.46    |
| 34                 | 18.27                      | 17.09   | 19.45   | 20.57   | 21.87   | 22.61   | 19.74   | 17.61   | 16.79   | 19.58    | 17.82    |
| 35                 | 17.28                      | 16.07   | 18.50   | 20.27   | 21.73   | 22.37   | 19.56   | 17.35   | 16.04   | 19.24    | 16.87    |
| 36                 | 18.00                      | 16.84   | 19.16   | 20.30   | 21.60   | 22.15   | 19.36   | 17.09   | 16.20   | 18.77    | 16.91    |
| 37                 | 18.30                      | 17.58   | 19.02   | 20.23   | 21.46   | 21.93   | 19.16   | 17.26   | 16.85   | 18.88    | 17.70    |

|    |       |       |       |       |       |       |       |       |       |       |       |
|----|-------|-------|-------|-------|-------|-------|-------|-------|-------|-------|-------|
| 38 | 18.84 | 17.04 | 20.63 | 20.53 | 21.31 | 21.72 | 19.06 | 17.32 | 16.53 | 19.41 | 17.81 |
| 39 | 19.75 | 17.80 | 21.70 | 21.33 | 21.25 | 21.52 | 18.98 | 17.21 | 16.53 | 20.61 | 18.62 |
| 40 | 21.03 | 19.04 | 23.02 | 22.13 | 21.26 | 21.32 | 18.89 | 17.41 | 17.15 | 21.29 | 19.47 |
| 41 | 20.94 | 19.28 | 22.60 | 22.54 | 21.36 | 21.17 | 18.88 | 17.73 | 17.75 | 21.99 | 19.92 |
| 42 | 20.64 | 19.48 | 21.81 | 22.49 | 21.51 | 21.03 | 18.90 | 18.16 | 18.34 | 21.81 | 19.97 |
| 43 | 18.16 | 17.67 | 18.66 | 21.58 | 21.60 | 20.91 | 19.00 | 18.28 | 17.81 | 21.72 | 19.12 |
| 44 | 17.17 | 15.65 | 18.70 | 20.81 | 21.60 | 20.82 | 19.00 | 17.72 | 16.33 | 20.41 | 17.18 |
| 45 | 16.98 | 15.35 | 18.62 | 20.58 | 21.52 | 20.80 | 18.85 | 16.89 | 15.24 | 19.85 | 16.29 |
| 46 | 17.51 | 16.43 | 18.59 | 20.42 | 21.36 | 20.70 | 18.52 | 16.50 | 15.58 | 19.18 | 16.67 |
| 47 | 16.63 | 15.84 | 17.42 | 19.77 | 21.15 | 20.57 | 18.29 | 16.47 | 15.58 | 18.82 | 16.45 |
| 48 | 16.03 | 15.26 | 16.81 | 19.22 | 20.91 | 20.46 | 18.12 | 16.30 | 15.28 | 18.36 | 16.02 |
| 49 | 15.65 | 14.57 | 16.73 | 18.82 | 20.69 | 20.35 | 17.96 | 16.00 | 14.68 | 17.73 | 15.28 |
| 50 | 14.90 | 14.35 | 15.46 | 18.32 | 20.43 | 20.20 | 17.76 | 15.57 | 14.34 | 17.20 | 14.86 |
| 51 | 14.90 | 13.62 | 16.19 | 18.10 | 20.17 | 20.05 | 17.50 | 15.24 | 13.86 | 16.63 | 14.22 |
| 52 | 13.40 | 11.74 | 15.05 | 17.72 | 19.90 | 19.89 | 17.25 | 14.56 | 12.51 | 16.20 | 12.94 |
| 53 | 13.15 | 11.55 | 14.74 | 17.31 | 19.60 | 19.72 | 16.88 | 13.75 | 11.82 | 15.62 | 12.50 |
| 54 | 14.20 | 12.58 | 15.81 | 17.20 | 19.28 | 19.50 | 16.47 | 13.45 | 12.20 | 15.32 | 12.95 |
| 55 | 15.28 | 13.56 | 17.00 | 17.56 | 18.99 | 19.26 | 16.15 | 13.61 | 12.91 | 15.86 | 14.05 |
| 56 | 14.35 | 12.74 | 15.95 | 17.47 | 18.76 | 19.02 | 15.93 | 13.59 | 12.43 | 16.80 | 13.95 |
| 57 | 14.66 | 13.17 | 16.14 | 17.56 | 18.60 | 18.80 | 15.74 | 13.34 | 12.29 | 16.89 | 14.01 |
| 58 | 15.00 | 13.06 | 16.93 | 17.67 | 18.47 | 18.52 | 15.50 | 13.19 | 12.16 | 16.65 | 13.82 |
| 59 | 15.29 | 13.09 | 17.48 | 18.09 | 18.37 | 18.28 | 15.29 | 13.01 | 11.96 | 17.52 | 14.15 |
| 60 | 14.94 | 13.25 | 16.62 | 18.09 | 18.30 | 18.06 | 15.10 | 12.85 | 11.96 | 17.87 | 14.29 |
| 61 | 14.13 | 12.80 | 15.46 | 17.66 | 18.23 | 17.86 | 14.91 | 12.81 | 12.06 | 17.61 | 14.01 |
| 62 | 12.89 | 11.38 | 14.40 | 16.86 | 18.11 | 17.67 | 14.72 | 12.56 | 11.24 | 16.55 | 12.57 |
| 63 | 13.09 | 11.24 | 14.94 | 16.74 | 17.94 | 17.48 | 14.52 | 12.09 | 10.76 | 15.99 | 12.09 |
| 64 | 12.56 | 11.39 | 13.74 | 16.14 | 17.72 | 17.28 | 14.26 | 11.82 | 10.81 | 15.10 | 11.87 |
| 65 | 12.77 | 11.54 | 14.00 | 15.78 | 17.49 | 17.10 | 14.05 | 11.84 | 11.08 | 14.66 | 11.98 |
| 66 | 13.02 | 12.09 | 13.96 | 15.65 | 17.20 | 16.90 | 13.89 | 12.00 | 11.52 | 14.53 | 12.35 |
| 67 | 12.61 | 11.20 | 14.03 | 15.32 | 16.94 | 16.70 | 13.80 | 12.02 | 11.18 | 14.26 | 11.93 |
| 68 | 13.01 | 12.01 | 14.00 | 15.37 | 16.72 | 16.50 | 13.69 | 11.93 | 11.40 | 14.77 | 12.70 |
| 69 | 13.59 | 12.60 | 14.57 | 15.54 | 16.64 | 16.45 | 13.79 | 12.42 | 12.19 | 15.08 | 13.26 |
| 70 | 12.16 | 11.93 | 12.38 | 14.90 | 16.38 | 16.18 | 13.59 | 12.39 | 12.00 | 14.93 | 12.82 |
| 71 | 11.78 | 10.83 | 12.74 | 14.38 | 16.17 | 16.00 | 13.54 | 12.13 | 11.16 | 13.93 | 11.58 |
| 72 | 11.87 | 11.29 | 12.46 | 14.22 | 15.96 | 15.85 | 13.45 | 11.85 | 11.11 | 13.58 | 11.70 |
| 73 | 12.77 | 12.11 | 13.44 | 14.25 | 15.76 | 15.72 | 13.34 | 11.91 | 11.54 | 13.57 | 12.24 |
| 74 | 12.95 | 11.97 | 13.93 | 14.43 | 15.56 | 15.55 | 13.30 | 12.04 | 11.66 | 13.92 | 12.38 |
| 75 | 13.55 | 12.92 | 14.18 | 14.73 | 15.43 | 15.40 | 13.24 | 12.24 | 12.18 | 14.15 | 12.94 |
| 76 | 14.13 | 13.66 | 14.60 | 14.83 | 15.34 | 15.26 | 13.28 | 12.65 | 12.87 | 14.35 | 13.54 |
| 77 | 15.03 | 13.86 | 16.19 | 15.46 | 15.30 | 15.15 | 13.37 | 13.02 | 13.19 | 14.80 | 13.89 |
| 78 | 12.45 | 12.11 | 12.80 | 14.93 | 15.35 | 15.07 | 13.48 | 12.95 | 12.34 | 14.77 | 12.83 |
| 79 | 13.48 | 12.78 | 14.18 | 14.81 | 15.34 | 15.00 | 13.50 | 12.68 | 12.30 | 14.33 | 13.01 |
| 80 | 14.74 | 13.77 | 15.72 | 15.29 | 15.30 | 14.96 | 13.49 | 12.79 | 12.82 | 15.07 | 13.89 |
| 81 | 14.40 | 14.02 | 14.78 | 15.46 | 15.30 | 14.90 | 13.50 | 13.10 | 13.32 | 15.57 | 14.42 |
| 82 | 14.52 | 14.04 | 14.99 | 15.41 | 15.34 | 14.87 | 13.56 | 13.38 | 13.60 | 15.20 | 14.44 |

|     |       |       |       |       |       |       |       |       |       |       |       |
|-----|-------|-------|-------|-------|-------|-------|-------|-------|-------|-------|-------|
| 83  | 14.32 | 13.93 | 14.71 | 15.24 | 15.33 | 14.82 | 13.67 | 13.68 | 13.85 | 15.05 | 14.33 |
| 84  | 13.42 | 13.41 | 13.42 | 14.80 | 15.30 | 14.79 | 13.78 | 13.86 | 13.78 | 14.78 | 13.85 |
| 85  | 13.07 | 12.61 | 13.54 | 14.65 | 15.24 | 14.74 | 13.84 | 13.59 | 13.00 | 14.47 | 13.13 |
| 86  | 12.50 | 12.03 | 12.98 | 14.42 | 15.20 | 14.73 | 13.81 | 13.08 | 12.22 | 14.31 | 12.53 |
| 87  | 12.76 | 12.45 | 13.06 | 14.35 | 15.15 | 14.71 | 13.70 | 12.82 | 12.31 | 14.10 | 12.74 |
| 88  | 12.86 | 12.33 | 13.39 | 14.28 | 15.04 | 14.70 | 13.60 | 12.76 | 12.28 | 13.85 | 12.75 |
| 89  | 11.98 | 11.89 | 12.08 | 13.97 | 14.93 | 14.62 | 13.51 | 12.68 | 12.14 | 13.97 | 12.66 |
| 90  | 11.74 | 11.13 | 12.34 | 13.60 | 14.78 | 14.55 | 13.39 | 12.31 | 11.37 | 13.47 | 11.70 |
| 91  | 11.95 | 11.58 | 12.32 | 13.62 | 14.64 | 14.48 | 13.25 | 12.03 | 11.38 | 13.42 | 11.97 |
| 92  | 12.84 | 12.01 | 13.67 | 13.98 | 14.54 | 14.40 | 13.11 | 12.02 | 11.60 | 13.65 | 12.37 |
| 93  | 12.19 | 11.64 | 12.73 | 14.06 | 14.46 | 14.34 | 13.00 | 12.02 | 11.52 | 13.93 | 12.09 |
| 94  | 11.46 | 10.90 | 12.02 | 13.66 | 14.40 | 14.21 | 12.88 | 11.80 | 10.99 | 13.43 | 11.24 |
| 95  | 11.40 | 10.51 | 12.29 | 13.70 | 14.31 | 14.13 | 12.75 | 11.56 | 10.72 | 13.38 | 11.11 |
| 96  | 10.68 | 9.14  | 12.23 | 13.53 | 14.20 | 14.00 | 12.60 | 11.07 | 9.59  | 12.91 | 9.77  |
| 97  | 9.56  | 8.95  | 10.18 | 13.07 | 14.14 | 13.94 | 12.41 | 10.52 | 9.19  | 12.48 | 9.47  |
| 98  | 8.99  | 8.73  | 9.24  | 12.14 | 13.97 | 13.82 | 12.10 | 10.14 | 9.02  | 11.52 | 9.20  |
| 99  | 9.70  | 9.08  | 10.32 | 11.82 | 13.69 | 13.66 | 11.82 | 9.99  | 9.12  | 11.02 | 9.37  |
| 100 | 10.04 | 9.30  | 10.77 | 11.81 | 13.42 | 13.51 | 11.62 | 9.94  | 9.23  | 11.22 | 9.59  |
| 101 | 10.27 | 9.85  | 10.68 | 11.91 | 13.19 | 13.35 | 11.47 | 9.99  | 9.50  | 11.68 | 10.01 |
| 102 | 10.66 | 10.13 | 11.18 | 11.97 | 13.01 | 13.17 | 11.34 | 10.13 | 9.81  | 11.73 | 10.21 |
| 103 | 9.75  | 9.53  | 9.96  | 11.62 | 12.86 | 13.03 | 11.29 | 10.16 | 9.63  | 11.55 | 9.87  |
| 104 | 10.37 | 9.77  | 10.97 | 11.70 | 12.72 | 12.89 | 11.20 | 10.10 | 9.66  | 11.38 | 10.02 |
| 105 | 9.85  | 9.03  | 10.67 | 11.65 | 12.60 | 12.76 | 11.15 | 9.98  | 9.22  | 11.39 | 9.50  |
| 106 | 10.80 | 10.05 | 11.54 | 11.94 | 12.49 | 12.63 | 11.04 | 9.85  | 9.46  | 11.30 | 10.04 |
| 107 | 11.29 | 10.24 | 12.35 | 12.24 | 12.40 | 12.51 | 10.96 | 10.04 | 9.78  | 11.55 | 10.36 |
| 108 | 12.43 | 10.40 | 14.45 | 13.16 | 12.42 | 12.37 | 10.91 | 10.10 | 9.77  | 12.31 | 10.65 |
| 109 | 10.14 | 9.45  | 10.83 | 12.78 | 12.47 | 12.28 | 10.90 | 10.00 | 9.38  | 12.79 | 10.16 |
| 110 | 10.24 | 9.78  | 10.70 | 12.17 | 12.50 | 12.17 | 10.82 | 9.84  | 9.44  | 11.98 | 10.08 |
| 111 | 10.92 | 10.05 | 11.79 | 12.21 | 12.48 | 12.10 | 10.74 | 9.88  | 9.52  | 11.58 | 10.16 |
| 112 | 10.43 | 9.99  | 10.87 | 12.18 | 12.44 | 12.07 | 10.70 | 9.93  | 9.63  | 11.58 | 10.26 |
| 113 | 10.71 | 10.15 | 11.27 | 11.95 | 12.36 | 11.98 | 10.70 | 9.96  | 9.71  | 11.33 | 10.11 |
| 114 | 11.15 | 10.61 | 11.69 | 12.18 | 12.29 | 11.89 | 10.62 | 10.07 | 10.04 | 11.72 | 10.55 |
| 115 | 11.61 | 10.88 | 12.33 | 12.35 | 12.21 | 11.80 | 10.64 | 10.20 | 10.18 | 11.84 | 10.84 |
| 116 | 11.77 | 11.35 | 12.20 | 12.46 | 12.20 | 11.77 | 10.70 | 10.42 | 10.60 | 12.18 | 11.31 |
| 117 | 12.50 | 11.95 | 13.06 | 12.72 | 12.24 | 11.70 | 10.75 | 10.72 | 11.06 | 12.52 | 11.81 |
| 118 | 12.45 | 11.96 | 12.94 | 13.04 | 12.33 | 11.70 | 10.86 | 11.01 | 11.20 | 13.01 | 12.04 |
| 119 | 11.58 | 10.86 | 12.30 | 13.15 | 12.45 | 11.70 | 10.99 | 10.94 | 10.63 | 13.15 | 11.38 |
| 120 | 11.40 | 10.67 | 12.12 | 13.06 | 12.55 | 11.70 | 11.00 | 10.70 | 10.32 | 12.87 | 11.13 |
| 121 | 10.53 | 10.21 | 10.86 | 12.67 | 12.60 | 11.70 | 11.00 | 10.54 | 10.12 | 12.81 | 10.96 |
| 122 | 10.80 | 9.49  | 12.11 | 12.48 | 12.55 | 11.70 | 10.90 | 10.18 | 9.37  | 12.11 | 9.99  |
| 123 | 11.42 | 9.99  | 12.85 | 13.07 | 12.50 | 11.70 | 10.76 | 9.82  | 9.16  | 12.01 | 10.05 |
| 124 | 10.17 | 9.01  | 11.33 | 12.82 | 12.50 | 11.65 | 10.60 | 9.52  | 8.66  | 12.14 | 9.75  |
| 125 | 8.90  | 9.97  | 7.83  | 10.11 | 12.26 | 12.09 | 11.11 | 9.94  | 8.12  | 12.05 | 9.18  |
| 126 | 10.04 | 11.65 | 8.43  | 11.47 | 12.60 | 12.47 | 11.61 | 10.37 | 7.86  | 11.63 | 9.01  |
| 127 | 9.43  | 10.98 | 7.87  | 9.46  | 11.53 | 12.33 | 11.49 | 10.08 | 7.63  | 11.04 | 8.56  |

|     |       |       |       |       |       |       |       |       |       |       |       |
|-----|-------|-------|-------|-------|-------|-------|-------|-------|-------|-------|-------|
| 128 | 9.79  | 11.08 | 8.50  | 11.74 | 11.97 | 12.17 | 11.40 | 9.87  | 7.99  | 10.74 | 8.54  |
| 129 | 10.20 | 11.08 | 9.32  | 11.30 | 11.77 | 12.05 | 11.28 | 9.73  | 8.55  | 10.88 | 9.26  |
| 130 | 10.76 | 11.73 | 9.79  | 13.85 | 12.89 | 12.00 | 11.16 | 9.63  | 8.99  | 11.56 | 9.96  |
| 131 | 11.27 | 11.87 | 10.67 | 12.90 | 12.82 | 11.99 | 11.07 | 9.64  | 9.72  | 11.96 | 10.55 |
| 132 | 10.86 | 11.84 | 9.89  | 10.70 | 12.27 | 12.00 | 11.00 | 9.71  | 9.23  | 12.06 | 10.59 |
| 133 | 10.48 | 11.51 | 9.44  | 12.07 | 12.38 | 12.00 | 10.97 | 9.80  | 8.99  | 12.10 | 10.28 |
| 134 | 11.05 | 11.60 | 10.50 | 13.64 | 12.74 | 12.06 | 10.95 | 9.80  | 9.78  | 12.11 | 10.44 |
| 135 | 12.08 | 12.76 | 11.41 | 13.71 | 13.33 | 12.10 | 10.91 | 9.82  | 10.13 | 12.68 | 11.43 |
| 136 | 11.84 | 12.91 | 10.77 | 12.18 | 13.03 | 12.17 | 10.90 | 9.94  | 9.93  | 12.92 | 11.29 |
| 137 | 11.82 | 12.89 | 10.74 | 12.41 | 12.94 | 12.24 | 10.91 | 10.04 | 10.02 | 12.62 | 10.94 |
| 138 | 12.03 | 12.85 | 11.21 | 12.84 | 12.95 | 12.30 | 10.98 | 10.10 | 10.43 | 12.47 | 11.20 |
| 139 | 12.56 | 13.16 | 11.96 | 14.01 | 13.36 | 12.37 | 11.00 | 10.21 | 10.83 | 12.59 | 11.61 |
| 140 | 12.56 | 13.45 | 11.66 | 13.96 | 13.74 | 12.46 | 11.03 | 10.33 | 10.68 | 12.86 | 11.90 |
| 141 | 13.07 | 13.66 | 12.47 | 15.88 | 14.60 | 12.65 | 11.11 | 10.46 | 11.30 | 13.18 | 12.36 |
| 142 | 12.89 | 13.83 | 11.96 | 13.40 | 14.10 | 12.78 | 11.18 | 10.55 | 11.06 | 13.58 | 12.56 |
| 143 | 12.21 | 13.49 | 10.93 | 12.45 | 13.55 | 12.85 | 11.20 | 10.68 | 10.47 | 13.02 | 11.48 |
| 144 | 11.94 | 13.29 | 10.60 | 13.52 | 13.53 | 12.90 | 11.29 | 10.73 | 9.84  | 12.66 | 11.07 |
| 145 | 11.82 | 13.55 | 10.08 | 14.88 | 14.19 | 12.90 | 11.32 | 10.71 | 9.18  | 13.11 | 10.97 |
| 146 | 12.03 | 13.85 | 10.20 | 14.56 | 14.50 | 12.98 | 11.40 | 10.60 | 8.84  | 13.71 | 10.86 |
| 147 | 12.30 | 13.66 | 10.93 | 15.10 | 14.77 | 13.10 | 11.41 | 10.45 | 9.49  | 13.68 | 11.16 |
| 148 | 12.42 | 13.78 | 11.07 | 13.69 | 14.40 | 13.11 | 11.40 | 10.32 | 9.96  | 13.39 | 11.26 |
| 149 | 12.28 | 13.38 | 11.18 | 12.49 | 13.69 | 13.11 | 11.40 | 10.31 | 10.34 | 13.01 | 11.37 |
| 150 | 12.15 | 13.24 | 11.68 | 13.39 | 13.62 | 13.10 | 11.40 | 10.38 | 10.64 | 12.83 | 11.60 |

**Table S2:** Daily average temperatures recorded over the period of 150 days at different points at the mid level of the silo.

| Days after storage | Temperature (°C) Mid-level |         |         |         |         |         |         |         |         |          |          |
|--------------------|----------------------------|---------|---------|---------|---------|---------|---------|---------|---------|----------|----------|
|                    | point 1                    | Point 2 | point 3 | point 4 | point 5 | point 6 | point 7 | point 8 | point 9 | point 10 | point 11 |
| 0                  | 29.50                      | 29.50   | 29.50   | 29.50   | 29.50   | 29.50   | 29.50   | 29.50   | 29.50   | 29.50    | 29.50    |
| 1                  | 28.35                      | 24.53   | 25.66   | 29.14   | 29.50   | 29.30   | 29.20   | 23.68   | 23.11   |          |          |
| 2                  | 28.55                      | 24.84   | 27.61   | 29.04   | 29.22   | 29.29   | 28.94   | 25.59   | 24.35   |          |          |
| 3                  | 28.31                      | 24.99   | 27.46   | 29.02   | 29.20   | 29.07   | 28.72   | 25.63   | 24.22   |          |          |
| 4                  | 28.18                      | 24.09   | 26.87   | 28.90   | 29.16   | 29.01   | 28.52   | 25.29   | 23.16   |          |          |
| 5                  | 27.83                      | 23.58   | 25.32   | 28.83   | 29.15   | 28.86   | 28.30   | 24.91   | 22.86   |          |          |
| 6                  | 27.08                      | 23.57   | 26.75   | 28.53   | 29.10   | 28.83   | 28.08   | 24.73   | 22.97   |          |          |
| 7                  | 27.54                      | 24.39   | 28.73   | 28.31   | 29.10   | 28.81   | 27.88   | 24.84   | 23.85   |          |          |
| 8                  | 28.05                      | 24.92   | 27.53   | 28.09   | 29.10   | 28.80   | 27.71   | 25.00   | 24.08   |          |          |
| 9                  | 27.64                      | 24.10   | 26.55   | 27.65   | 29.05   | 28.78   | 27.53   | 24.80   | 23.00   |          |          |
| 10                 | 27.06                      | 22.84   | 23.78   | 26.42   | 29.05   | 28.78   | 27.31   | 24.23   | 21.85   |          |          |
| 11                 | 25.94                      | 22.20   | 21.73   | 25.69   | 29.05   | 28.63   | 27.08   | 23.79   | 21.43   |          |          |
| 12                 | 24.54                      | 21.35   | 21.25   | 25.57   | 29.04   | 28.56   | 26.82   | 23.30   | 20.90   |          |          |
| 13                 | 24.03                      | 21.25   | 22.13   | 25.33   | 29.03   | 28.55   | 26.55   | 22.99   | 20.80   |          |          |
| 14                 | 23.88                      | 20.72   | 21.37   | 25.24   | 28.58   | 28.54   | 26.26   | 22.61   | 20.16   |          |          |
| 15                 | 23.58                      | 20.29   | 21.20   | 25.01   | 28.30   | 28.53   | 25.98   | 22.25   | 19.93   |          |          |



|    |       |       |       |       |       |       |       |       |       |
|----|-------|-------|-------|-------|-------|-------|-------|-------|-------|
| 16 | 23.08 | 19.69 | 20.20 | 24.96 | 27.84 | 28.28 | 25.69 | 21.84 | 19.18 |
| 17 | 22.83 | 19.03 | 21.56 | 24.56 | 27.70 | 28.21 | 25.38 | 21.29 | 18.37 |
| 18 | 23.28 | 19.02 | 23.11 | 24.30 | 27.20 | 28.03 | 25.28 | 20.87 | 18.22 |
| 19 | 23.92 | 19.44 | 24.52 | 24.23 | 27.20 | 28.02 | 25.05 | 20.66 | 18.43 |
| 20 | 24.55 | 19.79 | 25.40 | 24.19 | 27.20 | 27.99 | 24.73 | 20.57 | 18.65 |
| 21 | 24.78 | 20.19 | 23.00 | 23.63 | 27.07 | 27.73 | 24.45 | 20.62 | 19.11 |
| 22 | 23.78 | 20.02 | 20.69 | 23.52 | 27.00 | 27.49 | 24.20 | 20.63 | 19.00 |
| 23 | 22.69 | 19.41 | 20.35 | 23.40 | 26.52 | 27.42 | 23.98 | 20.43 | 18.57 |
| 24 | 22.07 | 18.78 | 19.57 | 22.74 | 26.40 | 27.31 | 23.73 | 20.09 | 17.94 |
| 25 | 21.49 | 18.03 | 18.62 | 22.04 | 26.20 | 27.25 | 23.51 | 19.68 | 17.35 |
| 26 | 21.07 | 17.84 | 19.20 | 21.77 | 25.83 | 27.07 | 23.27 | 19.42 | 17.34 |
| 27 | 21.20 | 18.16 | 19.50 | 21.73 | 25.68 | 27.00 | 23.03 | 19.31 | 17.65 |
| 28 | 21.09 | 18.41 | 20.52 | 21.85 | 25.22 | 26.75 | 22.78 | 19.35 | 18.06 |
| 29 | 21.33 | 18.78 | 21.24 | 22.14 | 25.04 | 26.50 | 22.58 | 19.38 | 18.10 |
| 30 | 21.56 | 18.93 | 19.26 | 22.06 | 24.94 | 26.25 | 22.38 | 19.40 | 18.10 |
| 31 | 20.82 | 18.14 | 19.46 | 21.40 | 24.50 | 25.98 | 22.18 | 19.13 | 17.33 |
| 32 | 20.69 | 17.67 | 18.48 | 21.13 | 24.30 | 25.56 | 21.98 | 18.94 | 17.12 |
| 33 | 20.45 | 17.80 | 19.61 | 21.15 | 24.22 | 25.46 | 21.96 | 18.88 | 17.33 |
| 34 | 20.97 | 18.18 | 20.25 | 21.50 | 23.80 | 25.39 | 21.89 | 18.92 | 17.59 |
| 35 | 20.90 | 17.49 | 18.95 | 21.17 | 23.78 | 25.13 | 21.67 | 18.64 | 16.95 |
| 36 | 20.77 | 17.50 | 19.52 | 21.14 | 23.60 | 24.88 | 21.47 | 18.43 | 17.01 |
| 37 | 20.59 | 17.97 | 19.81 | 21.15 | 23.60 | 24.64 | 21.29 | 18.44 | 17.49 |
| 38 | 20.45 | 17.88 | 21.04 | 21.27 | 23.10 | 24.38 | 21.11 | 18.44 | 17.29 |
| 39 | 21.02 | 18.04 | 22.30 | 22.18 | 23.10 | 24.17 | 20.95 | 18.33 | 17.19 |
| 40 | 21.59 | 18.73 | 23.54 | 22.95 | 23.10 | 23.92 | 20.79 | 18.38 | 17.63 |
| 41 | 22.29 | 19.43 | 23.31 | 23.47 | 23.10 | 23.72 | 20.66 | 18.54 | 18.10 |
| 42 | 22.39 | 19.75 | 22.75 | 23.41 | 23.10 | 23.50 | 20.56 | 18.80 | 18.53 |
| 43 | 21.96 | 19.30 | 19.76 | 22.57 | 23.10 | 23.30 | 20.46 | 18.85 | 18.19 |
| 44 | 20.77 | 17.81 | 19.32 | 21.58 | 23.10 | 23.10 | 20.35 | 18.48 | 17.02 |
| 45 | 20.34 | 16.87 | 19.16 | 21.40 | 23.10 | 22.95 | 20.26 | 17.96 | 16.14 |
| 46 | 20.42 | 17.08 | 19.52 | 21.37 | 22.98 | 22.77 | 20.11 | 17.68 | 16.32 |
| 47 | 20.13 | 17.05 | 18.21 | 20.74 | 22.90 | 22.63 | 19.95 | 17.57 | 16.36 |
| 48 | 19.65 | 16.67 | 17.72 | 20.23 | 22.57 | 22.48 | 19.78 | 17.39 | 16.03 |
| 49 | 19.17 | 15.99 | 17.26 | 19.66 | 22.36 | 22.35 | 19.64 | 17.09 | 15.42 |
| 50 | 18.99 | 15.76 | 16.14 | 19.24 | 22.20 | 22.23 | 19.45 | 16.80 | 15.19 |
| 51 | 18.38 | 15.32 | 16.88 | 18.92 | 21.74 | 22.08 | 19.28 | 16.50 | 14.82 |
| 52 | 18.07 | 14.25 | 15.60 | 18.52 | 21.63 | 21.94 | 19.07 | 16.00 | 13.70 |
| 53 | 17.48 | 13.44 | 15.21 | 18.09 | 21.38 | 21.79 | 18.83 | 15.43 | 13.06 |
| 54 | 16.99 | 13.58 | 16.18 | 17.98 | 20.99 | 21.64 | 18.59 | 15.14 | 13.28 |
| 55 | 17.03 | 14.19 | 17.58 | 18.35 | 20.90 | 21.47 | 18.33 | 15.11 | 13.80 |
| 56 | 17.06 | 14.13 | 16.67 | 18.32 | 20.57 | 21.31 | 18.08 | 15.02 | 13.46 |
| 57 | 17.16 | 14.12 | 16.88 | 18.48 | 20.40 | 21.15 | 17.86 | 14.83 | 13.29 |
| 58 | 17.30 | 14.10 | 17.65 | 18.58 | 20.34 | 20.96 | 17.65 | 14.67 | 13.20 |
| 59 | 17.71 | 14.19 | 18.40 | 19.13 | 20.20 | 20.76 | 17.45 | 14.53 | 13.03 |
| 60 | 17.97 | 14.28 | 17.69 | 19.28 | 20.20 | 20.57 | 17.26 | 14.38 | 13.02 |

|     |       |       |       |       |       |       |       |       |       |       |       |
|-----|-------|-------|-------|-------|-------|-------|-------|-------|-------|-------|-------|
| 61  | 17.75 | 14.30 | 16.60 | 18.91 | 20.20 | 20.38 | 17.07 | 14.31 | 13.11 |       |       |
| 62  | 17.01 | 13.47 | 15.23 | 18.03 | 20.20 | 20.18 | 16.89 | 14.10 | 12.48 |       |       |
| 63  | 16.56 | 12.90 | 15.79 | 17.87 | 19.95 | 19.99 | 16.72 | 13.78 | 12.01 |       |       |
| 64  | 16.39 | 12.69 | 14.49 | 17.35 | 19.70 | 19.81 | 16.54 | 13.54 | 11.93 |       |       |
| 65  | 15.80 | 12.75 | 14.78 | 16.91 | 19.57 | 19.63 | 16.32 | 13.43 | 12.09 |       |       |
| 66  | 15.62 | 12.92 | 14.98 | 16.84 | 19.42 | 19.45 | 16.14 | 13.40 | 12.34 |       |       |
| 67  | 15.35 | 12.60 | 14.57 | 16.35 | 19.00 | 19.29 | 15.95 | 13.33 | 12.05 |       |       |
| 68  | 15.23 | 12.66 | 14.73 | 16.48 | 18.84 | 19.13 | 15.81 | 13.24 | 12.18 |       |       |
| 69  | 15.13 | 13.05 | 15.18 | 16.47 | 18.76 | 18.98 | 15.72 | 13.42 | 12.63 |       |       |
| 70  | 15.03 | 13.21 | 13.30 | 15.96 | 18.30 | 18.78 | 15.57 | 13.43 | 12.68 |       |       |
| 71  | 14.58 | 12.41 | 12.92 | 15.19 | 18.16 | 18.61 | 15.43 | 13.25 | 11.98 | 14.35 | 12.54 |
| 72  | 14.57 | 12.17 | 12.86 | 15.03 | 18.00 | 18.43 | 15.31 | 13.03 | 11.81 | 14.06 | 12.61 |
| 73  | 14.37 | 12.50 | 14.06 | 15.08 | 17.60 | 18.24 | 15.17 | 13.00 | 12.15 | 14.24 | 12.98 |
| 74  | 14.52 | 12.62 | 14.62 | 15.32 | 17.44 | 18.05 | 15.05 | 13.00 | 12.19 | 14.44 | 13.00 |
| 75  | 14.77 | 13.00 | 14.74 | 15.64 | 17.40 | 17.85 | 14.93 | 13.07 | 12.56 | 14.63 | 13.49 |
| 76  | 14.84 | 13.52 | 15.13 | 15.68 | 17.17 | 17.66 | 14.84 | 13.27 | 13.06 | 14.90 | 13.92 |
| 77  | 15.15 | 13.92 | 16.80 | 16.18 | 16.90 | 17.49 | 14.77 | 13.47 | 13.35 | 15.17 | 13.90 |
| 78  | 15.37 | 13.35 | 13.43 | 15.75 | 16.90 | 17.33 | 14.70 | 13.44 | 12.74 | 14.52 | 13.13 |
| 79  | 14.78 | 13.01 | 14.45 | 15.40 | 16.90 | 17.16 | 14.65 | 13.29 | 12.64 | 14.91 | 13.53 |
| 80  | 14.85 | 13.51 | 15.80 | 15.75 | 16.83 | 17.00 | 14.60 | 13.35 | 13.05 | 15.67 | 14.18 |
| 81  | 15.45 | 14.13 | 15.29 | 16.03 | 16.80 | 16.83 | 14.55 | 13.54 | 13.52 | 15.54 | 14.28 |
| 82  | 15.37 | 14.13 | 15.53 | 15.93 | 16.80 | 16.70 | 14.50 | 13.67 | 13.66 | 15.31 | 14.38 |
| 83  | 15.29 | 14.12 | 15.13 | 15.76 | 16.80 | 16.57 | 14.50 | 13.79 | 13.69 | 15.09 | 14.30 |
| 84  | 15.17 | 14.03 | 13.91 | 15.35 | 16.80 | 16.43 | 14.50 | 13.81 | 13.61 | 14.62 | 13.76 |
| 85  | 15.00 | 13.47 | 14.18 | 15.13 | 16.23 | 16.30 | 14.46 | 13.68 | 13.07 | 14.35 | 13.22 |
| 86  | 14.97 | 12.86 | 13.25 | 14.93 | 16.20 | 16.19 | 14.40 | 13.40 | 12.47 | 14.19 | 12.90 |
| 87  | 14.79 | 12.88 | 13.56 | 14.87 | 16.20 | 16.09 | 14.37 | 13.23 | 12.53 | 13.95 | 12.99 |
| 88  | 14.51 | 12.83 | 13.70 | 14.68 | 16.13 | 15.99 | 14.30 | 13.18 | 12.53 | 13.95 | 12.99 |
| 89  | 14.37 | 12.76 | 12.56 | 14.47 | 16.10 | 15.90 | 14.21 | 13.10 | 12.44 | 13.63 | 12.65 |
| 90  | 13.91 | 12.08 | 12.67 | 14.02 | 16.08 | 15.80 | 14.13 | 12.85 | 11.78 | 13.42 | 12.13 |
| 91  | 14.06 | 12.07 | 12.74 | 14.14 | 15.62 | 15.73 | 14.05 | 12.63 | 11.74 | 13.49 | 12.40 |
| 92  | 13.93 | 12.27 | 14.28 | 14.51 | 15.60 | 15.67 | 13.98 | 12.60 | 11.91 | 13.90 | 12.61 |
| 93  | 14.05 | 12.33 | 13.29 | 14.64 | 15.60 | 15.57 | 13.87 | 12.54 | 11.84 | 13.63 | 12.25 |
| 94  | 13.79 | 11.90 | 12.36 | 14.17 | 15.59 | 15.47 | 13.78 | 12.38 | 11.42 | 13.33 | 11.72 |
| 95  | 13.82 | 11.72 | 13.38 | 14.32 | 15.40 | 15.40 | 13.68 | 12.18 | 11.25 | 12.99 | 11.35 |
| 96  | 13.55 | 10.72 | 12.71 | 14.12 | 15.40 | 15.30 | 13.58 | 11.88 | 10.30 | 12.69 | 10.50 |
| 97  | 13.35 | 10.32 | 10.70 | 13.69 | 15.40 | 15.25 | 13.47 | 11.52 | 10.00 | 11.93 | 10.16 |
| 98  | 12.48 | 9.96  | 9.82  | 12.77 | 15.30 | 15.15 | 13.34 | 11.25 | 9.83  | 11.31 | 9.95  |
| 99  | 11.87 | 9.83  | 10.65 | 12.34 | 14.90 | 15.06 | 13.16 | 11.04 | 9.81  | 11.26 | 10.09 |
| 100 | 11.73 | 9.95  | 10.98 | 12.34 | 14.76 | 14.99 | 13.00 | 10.95 | 9.83  | 11.65 | 10.30 |
| 101 | 11.77 | 10.26 | 10.78 | 12.34 | 14.66 | 14.89 | 12.85 | 10.90 | 10.04 | 11.80 | 10.52 |
| 102 | 11.88 | 10.52 | 11.55 | 12.39 | 14.20 | 14.78 | 12.70 | 10.92 | 10.23 | 11.73 | 10.56 |
| 103 | 11.80 | 10.35 | 10.31 | 12.09 | 14.19 | 14.68 | 12.58 | 10.91 | 10.07 | 11.43 | 10.28 |
| 104 | 11.55 | 10.31 | 11.28 | 12.08 | 14.01 | 14.55 | 12.45 | 10.83 | 10.09 | 11.50 | 10.34 |
| 105 | 11.53 | 9.99  | 10.63 | 11.93 | 14.00 | 14.43 | 12.35 | 10.71 | 9.72  | 11.30 | 9.98  |

|     |       |       |       |       |       |       |       |       |       |       |       |
|-----|-------|-------|-------|-------|-------|-------|-------|-------|-------|-------|-------|
| 106 | 11.80 | 10.16 | 11.88 | 12.29 | 13.71 | 14.30 | 12.24 | 10.61 | 9.85  | 11.48 | 10.42 |
| 107 | 11.93 | 10.49 | 12.39 | 12.51 | 13.50 | 14.17 | 12.14 | 10.67 | 10.10 | 11.89 | 10.63 |
| 108 | 12.29 | 10.63 | 14.01 | 13.18 | 13.50 | 14.05 | 12.05 | 10.67 | 10.09 | 12.80 | 10.81 |
| 109 | 12.71 | 10.48 | 10.94 | 12.98 | 13.50 | 13.91 | 11.95 | 10.60 | 9.84  | 12.36 | 10.40 |
| 110 | 12.11 | 10.24 | 10.84 | 12.37 | 13.50 | 13.78 | 11.86 | 10.50 | 9.80  | 11.80 | 10.45 |
| 111 | 11.84 | 10.33 | 11.66 | 12.33 | 13.50 | 13.67 | 11.80 | 10.49 | 9.89  | 11.73 | 10.50 |
| 112 | 12.11 | 10.48 | 11.09 | 12.44 | 13.50 | 13.58 | 11.73 | 10.49 | 9.92  | 11.50 | 10.48 |
| 113 | 11.89 | 10.39 | 11.20 | 12.11 | 13.33 | 13.45 | 11.63 | 10.45 | 9.91  | 11.65 | 10.57 |
| 114 | 12.22 | 10.76 | 11.89 | 12.41 | 13.30 | 13.34 | 11.58 | 10.50 | 10.18 | 11.73 | 10.68 |
| 115 | 12.31 | 10.82 | 12.42 | 12.53 | 13.30 | 13.23 | 11.50 | 10.55 | 10.28 | 11.96 | 11.00 |
| 116 | 12.41 | 11.14 | 12.31 | 12.67 | 13.30 | 13.14 | 11.47 | 10.66 | 10.59 | 12.30 | 11.38 |
| 117 | 12.55 | 11.52 | 13.13 | 12.87 | 13.30 | 13.03 | 11.40 | 10.83 | 10.94 | 12.63 | 11.75 |
| 118 | 12.96 | 11.87 | 13.20 | 13.18 | 13.30 | 12.94 | 11.40 | 11.02 | 11.14 | 13.00 | 11.81 |
| 119 | 13.21 | 11.54 | 12.69 | 13.26 | 13.30 | 12.88 | 11.40 | 11.00 | 10.73 | 12.75 | 11.33 |
| 120 | 12.91 | 11.12 | 12.50 | 13.28 | 13.30 | 12.80 | 11.40 | 10.86 | 10.43 | 12.70 | 11.23 |
| 121 | 12.55 | 10.93 | 11.20 | 12.90 | 13.30 | 12.70 | 11.40 | 10.76 | 10.31 | 12.20 | 10.84 |
| 122 | 12.12 | 10.26 | 12.35 | 12.68 | 13.30 | 12.65 | 11.33 | 10.58 | 9.74  | 11.91 | 10.30 |
| 123 | 12.64 | 10.35 | 13.64 | 13.53 | 13.30 | 12.60 | 11.30 | 10.36 | 9.61  | 12.08 | 10.33 |
| 124 | 12.67 | 10.04 | 12.00 | 13.36 | 13.30 | 12.54 | 11.23 | 10.17 | 9.21  | 11.89 | 9.99  |
| 125 | 12.25 | 9.48  | 11.27 | 12.97 | 13.33 | 12.52 | 11.20 | 9.96  | 8.80  | 11.69 | 9.68  |
| 126 | 12.02 | 9.28  | 10.09 | 12.52 | 13.31 | 12.49 | 11.08 | 9.65  | 8.54  | 11.08 | 9.39  |
| 127 | 11.39 | 8.93  | 10.60 | 11.92 | 13.30 | 12.42 | 10.95 | 9.43  | 8.29  | 10.92 | 9.07  |
| 128 | 11.64 | 9.15  | 10.90 | 12.14 | 13.30 | 12.40 | 10.84 | 9.31  | 8.50  | 11.11 | 9.60  |
| 129 | 11.69 | 9.66  | 13.16 | 12.54 | 13.30 | 12.37 | 10.73 | 9.40  | 8.96  | 11.83 | 10.07 |
| 130 | 12.32 | 10.03 | 12.65 | 13.01 | 13.05 | 12.30 | 10.64 | 9.51  | 9.24  | 12.15 | 10.55 |
| 131 | 12.33 | 10.58 | 12.72 | 13.03 | 13.05 | 12.28 | 10.59 | 9.73  | 9.82  | 12.15 | 10.89 |
| 132 | 12.06 | 10.18 | 11.22 | 12.43 | 12.86 | 12.22 | 10.53 | 9.83  | 9.49  | 12.08 | 10.43 |
| 133 | 11.89 | 9.94  | 11.68 | 12.53 | 12.80 | 12.20 | 10.50 | 9.73  | 9.28  | 12.12 | 10.48 |
| 134 | 12.19 | 10.56 | 14.00 | 13.19 | 12.80 | 12.13 | 10.50 | 9.79  | 9.77  | 12.71 | 11.22 |
| 135 | 13.12 | 11.15 | 12.77 | 13.33 | 12.80 | 12.10 | 10.49 | 10.01 | 10.13 | 12.85 | 11.38 |
| 136 | 13.12 | 10.96 | 11.90 | 12.98 | 12.90 | 12.02 | 10.49 | 10.08 | 9.97  | 12.53 | 11.04 |
| 137 | 13.09 | 10.92 | 12.32 | 12.97 | 13.18 | 12.00 | 10.50 | 10.10 | 10.00 | 12.43 | 11.17 |
| 138 | 13.06 | 11.17 | 13.25 | 13.15 | 13.30 | 11.95 | 10.50 | 10.20 | 10.30 | 12.60 | 11.48 |
| 139 | 13.41 | 11.63 | 14.18 | 13.72 | 13.30 | 11.91 | 10.50 | 10.38 | 10.65 | 12.78 | 11.77 |
| 140 | 13.62 | 11.61 | 14.43 | 14.00 | 13.30 | 11.91 | 10.53 | 10.48 | 10.52 | 13.10 | 11.93 |
| 141 | 14.01 | 12.14 | 14.66 | 14.49 | 13.30 | 11.89 | 10.60 | 10.60 | 10.97 | 13.40 | 12.43 |
| 142 | 13.86 | 11.93 | 12.78 | 13.79 | 13.30 | 11.84 | 10.60 | 10.70 | 10.89 | 12.82 | 11.75 |
| 143 | 13.54 | 11.30 | 12.51 | 13.37 | 13.33 | 11.80 | 10.63 | 10.64 | 10.43 | 12.53 | 11.28 |
| 144 | 13.52 | 10.97 | 13.89 | 13.62 | 13.33 | 11.80 | 10.70 | 10.49 | 10.04 | 13.06 | 11.13 |
| 145 | 13.94 | 10.69 | 13.66 | 14.05 | 13.42 | 11.80 | 10.70 | 10.24 | 9.48  | 13.47 | 11.03 |
| 146 | 14.16 | 10.72 | 13.90 | 14.37 | 13.50 | 11.86 | 10.70 | 10.00 | 9.23  | 13.53 | 11.25 |
| 147 | 14.10 | 11.12 | 13.91 | 14.42 | 13.50 | 11.84 | 10.63 | 9.97  | 9.67  | 13.25 | 11.45 |
| 148 | 14.02 | 11.21 | 12.63 | 13.93 | 13.50 | 11.88 | 10.60 | 10.07 | 10.00 | 12.94 | 11.50 |
| 149 | 13.56 | 11.31 | 12.80 | 13.56 | 13.50 | 11.90 | 10.60 | 10.23 | 10.29 | 12.81 | 11.64 |

|     |       |       |       |       |       |       |       |       |       |       |       |
|-----|-------|-------|-------|-------|-------|-------|-------|-------|-------|-------|-------|
| 150 | 13.55 | 11.56 | 13.60 | 13.71 | 13.50 | 11.90 | 10.60 | 10.40 | 10.56 | 12.97 | 11.71 |
|-----|-------|-------|-------|-------|-------|-------|-------|-------|-------|-------|-------|

**Table S3:** Daily average temperatures recorded over the period of 150 days at different points at the bottom level of the silo.

| Days after storage | Temperature (°C) Bottom level |         |         |         |         |         |         |         |         |          |          |
|--------------------|-------------------------------|---------|---------|---------|---------|---------|---------|---------|---------|----------|----------|
|                    | point 1                       | Point 2 | point 3 | point 4 | point 5 | point 6 | point 7 | point 8 | point 9 | point 10 | point 11 |
| 0                  | 29.50                         | 29.50   | 29.50   | 29.50   | 29.50   | 29.50   | 29.50   | 29.50   | 29.50   | 29.50    | 29.50    |
| 1                  | 27.52                         | 24.07   | 25.56   | 25.22   | 29.16   | 30.03   | 28.85   | 25.72   | 24.64   | 28.29    | 26.57    |
| 2                  | 27.60                         | 24.25   | 26.92   | 28.07   | 29.15   | 30.02   | 28.48   | 25.63   | 24.56   | 27.90    | 26.49    |
| 3                  | 27.36                         | 24.29   | 26.88   | 27.96   | 29.10   | 30.01   | 28.16   | 25.44   | 24.17   | 27.64    | 26.40    |
| 4                  | 27.25                         | 23.24   | 26.38   | 27.78   | 29.08   | 29.36   | 27.90   | 25.18   | 24.14   | 27.62    | 25.74    |
| 5                  | 26.93                         | 22.72   | 25.10   | 27.43   | 29.08   | 29.33   | 27.65   | 24.94   | 24.13   | 27.61    | 25.51    |
| 6                  | 26.13                         | 22.77   | 25.85   | 27.09   | 29.08   | 29.27   | 27.41   | 24.81   | 23.95   | 27.23    | 24.80    |
| 7                  | 26.58                         | 23.89   | 27.76   | 27.64   | 29.03   | 29.10   | 27.17   | 24.79   | 23.77   | 27.20    | 24.60    |
| 8                  | 27.12                         | 24.34   | 27.07   | 27.87   | 28.91   | 29.04   | 26.94   | 24.72   | 23.74   | 27.00    | 24.04    |
| 9                  | 26.72                         | 23.27   | 26.04   | 27.47   | 28.60   | 29.03   | 26.74   | 24.43   | 23.69   | 26.71    | 23.92    |
| 10                 | 26.22                         | 21.87   | 23.66   | 26.77   | 28.51   | 29.03   | 26.54   | 24.42   | 23.06   | 26.54    | 22.98    |
| 11                 | 25.00                         | 21.16   | 21.82   | 25.73   | 28.21   | 28.78   | 26.32   | 24.12   | 22.57   | 25.62    | 21.56    |
| 12                 | 23.51                         | 20.22   | 21.00   | 24.58   | 27.81   | 28.56   | 25.42   | 23.71   | 22.12   | 24.01    | 20.70    |
| 13                 | 22.94                         | 20.20   | 21.65   | 24.15   | 27.39   | 28.32   | 26.08   | 23.35   | 21.70   | 23.63    | 20.99    |
| 14                 | 22.78                         | 19.59   | 20.93   | 23.75   | 27.05   | 28.11   | 25.82   | 22.98   | 21.18   | 23.15    | 19.88    |
| 15                 | 22.44                         | 19.21   | 20.63   | 23.33   | 26.56   | 27.87   | 25.52   | 22.58   | 20.92   | 22.20    | 19.27    |
| 16                 | 21.96                         | 18.54   | 19.84   | 22.80   | 26.11   | 27.59   | 25.22   | 22.18   | 20.42   | 21.64    | 18.26    |
| 17                 | 21.68                         | 17.86   | 20.68   | 22.55   | 26.38   | 27.33   | 24.88   | 21.73   | 19.79   | 20.95    | 17.82    |
| 18                 | 22.14                         | 18.13   | 22.05   | 22.97   | 25.80   | 27.03   | 24.54   | 21.29   | 19.39   | 21.90    | 19.46    |
| 19                 | 22.79                         | 18.74   | 23.24   | 23.53   | 25.71   | 26.74   | 24.21   | 20.92   | 19.27   | 22.65    | 19.93    |
| 20                 | 23.38                         | 19.09   | 24.06   | 24.05   | 25.70   | 26.30   | 23.86   | 20.68   | 19.25   | 23.32    | 20.82    |
| 21                 | 23.61                         | 19.55   | 22.53   | 24.10   | 25.30   | 26.46   | 23.53   | 20.53   | 19.48   | 24.05    | 21.24    |
| 22                 | 22.64                         | 19.23   | 20.44   | 23.21   | 25.20   | 26.17   | 23.26   | 20.46   | 19.50   | 22.91    | 19.69    |
| 23                 | 21.53                         | 18.47   | 19.86   | 22.38   | 25.09   | 25.87   | 22.99   | 20.33   | 19.08   | 21.62    | 18.57    |
| 24                 | 20.93                         | 17.74   | 19.11   | 21.77   | 24.81   | 25.60   | 22.73   | 20.12   | 18.84   | 20.83    | 17.54    |
| 25                 | 20.26                         | 16.93   | 18.23   | 21.15   | 24.44   | 25.32   | 22.52   | 19.83   | 18.31   | 19.95    | 16.72    |
| 26                 | 19.88                         | 16.83   | 18.58   | 20.77   | 24.13   | 25.05   | 22.28   | 19.54   | 18.11   | 19.34    | 16.66    |
| 27                 | 20.02                         | 17.19   | 18.78   | 20.68   | 23.76   | 24.80   | 22.03   | 19.31   | 18.10   | 19.15    | 17.16    |
| 28                 | 19.94                         | 17.67   | 19.69   | 20.70   | 23.56   | 24.54   | 21.78   | 19.14   | 18.17   | 19.19    | 18.19    |
| 29                 | 20.16                         | 17.97   | 20.18   | 20.89   | 23.10   | 24.30   | 21.54   | 19.08   | 18.20   | 19.99    | 18.88    |
| 30                 | 20.55                         | 18.28   | 19.05   | 20.97   | 22.97   | 24.05   | 21.33   | 19.03   | 18.24   | 20.13    | 18.24    |
| 31                 | 19.72                         | 17.17   | 18.70   | 20.35   | 22.90   | 23.78   | 21.12   | 18.90   | 17.85   | 19.10    | 16.94    |
| 32                 | 19.53                         | 16.65   | 17.96   | 20.06   | 22.41   | 23.44   | 20.70   | 18.41   | 17.34   | 18.89    | 16.73    |
| 33                 | 19.35                         | 17.01   | 18.77   | 20.00   | 22.34   | 23.21   | 20.14   | 17.66   | 16.66   | 18.68    | 17.11    |
| 34                 | 19.89                         | 17.51   | 19.10   | 20.24   | 22.28   | 23.20   | 20.18   | 17.83   | 17.05   | 19.19    | 17.64    |
| 35                 | 19.80                         | 16.62   | 17.65   | 19.78   | 22.18   | 22.96   | 19.96   | 17.51   | 16.23   | 18.98    | 16.32    |
| 36                 | 19.65                         | 16.72   | 18.10   | 19.59   | 21.72   | 22.73   | 19.77   | 17.36   | 16.43   | 18.42    | 16.57    |
| 37                 | 19.52                         | 17.30   | 18.76   | 19.63   | 21.68   | 22.50   | 19.60   | 17.46   | 17.12   | 18.50    | 17.70    |

|    |       |       |       |       |       |       |       |       |       |       |       |
|----|-------|-------|-------|-------|-------|-------|-------|-------|-------|-------|-------|
| 38 | 19.32 | 17.13 | 19.74 | 19.74 | 21.60 | 22.29 | 19.45 | 17.46 | 16.74 | 18.92 | 17.61 |
| 39 | 19.80 | 17.41 | 21.05 | 20.48 | 21.60 | 22.07 | 19.30 | 17.37 | 16.74 | 20.19 | 18.73 |
| 40 | 20.32 | 18.26 | 22.27 | 21.22 | 21.60 | 21.88 | 19.18 | 17.49 | 17.35 | 20.80 | 19.34 |
| 41 | 20.97 | 18.95 | 22.38 | 21.79 | 21.60 | 21.69 | 19.11 | 17.77 | 17.93 | 21.67 | 20.10 |
| 42 | 21.12 | 19.30 | 22.06 | 21.94 | 21.60 | 21.50 | 19.07 | 18.05 | 18.39 | 21.42 | 20.14 |
| 43 | 20.82 | 18.64 | 19.78 | 21.47 | 21.60 | 21.34 | 19.01 | 18.11 | 17.78 | 21.44 | 18.91 |
| 44 | 19.68 | 16.85 | 18.68 | 20.59 | 21.60 | 21.17 | 19.00 | 17.65 | 16.38 | 20.00 | 16.41 |
| 45 | 19.17 | 15.94 | 18.43 | 20.27 | 21.60 | 21.03 | 18.93 | 17.07 | 15.43 | 19.55 | 15.60 |
| 46 | 19.14 | 16.32 | 18.88 | 20.20 | 21.48 | 20.90 | 18.82 | 16.85 | 15.86 | 18.87 | 16.44 |
| 47 | 18.86 | 16.26 | 17.84 | 19.75 | 21.00 | 20.79 | 18.67 | 16.75 | 15.96 | 18.58 | 16.20 |
| 48 | 18.45 | 15.85 | 17.03 | 19.25 | 21.00 | 20.70 | 18.50 | 16.56 | 15.54 | 18.12 | 15.63 |
| 49 | 18.02 | 15.12 | 15.98 | 18.51 | 20.90 | 20.58 | 18.33 | 16.19 | 14.79 | 17.36 | 14.54 |
| 50 | 17.87 | 14.92 | 15.45 | 18.02 | 20.59 | 20.50 | 18.15 | 15.88 | 14.61 | 16.85 | 14.36 |
| 51 | 17.27 | 14.46 | 15.27 | 17.55 | 20.33 | 20.40 | 17.96 | 15.58 | 14.19 | 16.20 | 13.69 |
| 52 | 16.91 | 13.21 | 13.81 | 16.90 | 20.12 | 20.27 | 17.75 | 14.97 | 12.75 | 15.87 | 12.10 |
| 53 | 16.30 | 12.49 | 13.63 | 16.41 | 19.68 | 20.14 | 17.50 | 14.38 | 12.29 | 15.35 | 11.88 |
| 54 | 15.76 | 12.80 | 14.47 | 16.25 | 19.50 | 20.00 | 17.22 | 14.13 | 12.72 | 15.04 | 12.68 |
| 55 | 15.81 | 13.60 | 15.95 | 16.50 | 19.04 | 19.83 | 16.96 | 14.20 | 13.53 | 15.49 | 14.13 |
| 56 | 15.85 | 13.37 | 15.47 | 16.60 | 18.88 | 19.66 | 16.70 | 14.08 | 12.85 | 16.53 | 13.76 |
| 57 | 15.87 | 13.38 | 15.92 | 16.85 | 18.80 | 19.48 | 16.46 | 13.88 | 12.75 | 16.63 | 13.90 |
| 58 | 15.98 | 13.38 | 16.50 | 16.99 | 18.53 | 19.30 | 16.25 | 13.75 | 12.67 | 16.27 | 13.65 |
| 59 | 16.39 | 13.59 | 17.18 | 17.41 | 18.30 | 19.09 | 16.05 | 13.60 | 12.55 | 17.16 | 14.30 |
| 60 | 16.56 | 13.72 | 16.70 | 17.58 | 18.30 | 18.85 | 15.87 | 13.51 | 12.59 | 17.59 | 14.32 |
| 61 | 16.37 | 13.69 | 16.11 | 17.45 | 18.30 | 18.62 | 15.70 | 13.50 | 12.76 | 17.44 | 14.01 |
| 62 | 15.69 | 12.65 | 14.82 | 16.88 | 18.30 | 18.43 | 15.53 | 13.23 | 11.85 | 16.44 | 12.19 |
| 63 | 15.18 | 12.15 | 15.08 | 16.63 | 18.17 | 18.23 | 15.36 | 12.87 | 11.49 | 15.95 | 11.84 |
| 64 | 14.94 | 11.98 | 14.10 | 16.26 | 18.10 | 18.04 | 15.19 | 12.68 | 11.52 | 15.07 | 11.63 |
| 65 | 14.48 | 12.07 | 14.10 | 15.83 | 17.87 | 17.87 | 15.01 | 12.61 | 11.67 | 14.55 | 11.88 |
| 66 | 14.43 | 12.35 | 14.51 | 15.74 | 17.60 | 17.70 | 14.83 | 12.63 | 12.07 | 14.46 | 12.35 |
| 67 | 14.24 | 11.89 | 13.76 | 15.33 | 17.44 | 17.53 | 14.66 | 12.53 | 11.61 | 14.10 | 11.61 |
| 68 | 14.16 | 12.08 | 14.09 | 15.35 | 17.32 | 17.35 | 14.52 | 12.47 | 11.76 | 14.61 | 12.74 |
| 69 | 14.13 | 12.56 | 14.58 | 15.43 | 16.92 | 17.23 | 14.44 | 12.68 | 12.33 | 14.94 | 13.45 |
| 70 | 14.11 | 12.68 | 13.35 | 15.15 | 16.88 | 17.04 | 14.31 | 12.72 | 12.26 | 14.92 | 12.90 |
| 71 | 13.59 | 11.68 | 12.27 | 14.43 | 16.80 | 16.88 | 14.17 | 12.46 | 11.37 | 13.78 | 11.15 |
| 72 | 13.60 | 11.57 | 12.40 | 14.15 | 16.45 | 16.70 | 14.05 | 12.24 | 11.50 | 13.38 | 11.49 |
| 73 | 13.45 | 12.02 | 13.36 | 14.16 | 16.20 | 16.53 | 13.94 | 12.27 | 11.95 | 13.35 | 12.34 |
| 74 | 13.59 | 12.15 | 13.69 | 14.27 | 16.12 | 16.37 | 13.84 | 12.33 | 11.84 | 13.72 | 12.24 |
| 75 | 14.02 | 12.67 | 14.13 | 14.58 | 16.10 | 16.22 | 13.76 | 12.46 | 12.39 | 13.98 | 13.03 |
| 76 | 14.13 | 13.24 | 14.48 | 14.71 | 15.89 | 16.06 | 13.70 | 12.72 | 13.04 | 14.12 | 13.75 |
| 77 | 14.45 | 13.70 | 15.83 | 15.06 | 15.60 | 15.91 | 13.70 | 12.97 | 13.34 | 14.48 | 13.98 |
| 78 | 14.69 | 12.81 | 13.49 | 14.93 | 15.60 | 15.77 | 13.68 | 12.87 | 12.40 | 14.58 | 12.44 |
| 79 | 14.00 | 12.60 | 14.06 | 14.65 | 15.60 | 15.63 | 13.62 | 12.74 | 12.39 | 13.97 | 12.93 |
| 80 | 14.17 | 13.30 | 15.18 | 14.90 | 15.60 | 15.50 | 13.60 | 12.86 | 13.00 | 14.71 | 14.02 |
| 81 | 14.77 | 13.96 | 15.15 | 15.23 | 15.60 | 15.39 | 13.60 | 13.15 | 13.50 | 15.34 | 14.50 |
| 82 | 14.63 | 13.91 | 15.38 | 15.32 | 15.60 | 15.33 | 13.63 | 13.31 | 13.69 | 14.97 | 14.41 |

|     |       |       |       |       |       |       |       |       |       |       |       |
|-----|-------|-------|-------|-------|-------|-------|-------|-------|-------|-------|-------|
| 83  | 14.56 | 13.86 | 15.00 | 15.33 | 15.60 | 15.25 | 13.65 | 13.43 | 13.71 | 14.79 | 14.19 |
| 84  | 14.48 | 13.74 | 13.93 | 14.91 | 15.57 | 15.12 | 13.70 | 13.45 | 13.54 | 14.51 | 13.59 |
| 85  | 14.38 | 13.11 | 13.82 | 14.58 | 15.40 | 15.03 | 13.70 | 13.28 | 12.83 | 14.06 | 12.72 |
| 86  | 14.37 | 12.44 | 13.05 | 14.39 | 15.40 | 14.98 | 13.70 | 12.95 | 12.20 | 13.96 | 12.05 |
| 87  | 14.14 | 12.57 | 13.43 | 14.35 | 15.40 | 14.90 | 13.70 | 12.81 | 12.35 | 13.78 | 12.57 |
| 88  | 13.78 | 12.50 | 13.53 | 14.20 | 15.40 | 14.88 | 13.62 | 12.74 | 12.37 | 13.51 | 12.60 |
| 89  | 13.64 | 12.41 | 12.72 | 14.06 | 15.13 | 14.82 | 13.56 | 12.66 | 12.19 | 13.68 | 12.43 |
| 90  | 13.23 | 11.59 | 12.27 | 13.60 | 14.90 | 14.78 | 13.49 | 12.37 | 11.35 | 13.14 | 11.21 |
| 91  | 13.40 | 11.71 | 12.50 | 13.63 | 14.90 | 14.71 | 13.40 | 12.17 | 11.54 | 13.05 | 11.75 |
| 92  | 13.28 | 12.01 | 13.85 | 13.88 | 14.90 | 14.70 | 13.32 | 12.17 | 11.78 | 13.20 | 12.35 |
| 93  | 13.44 | 12.06 | 13.15 | 14.07 | 14.83 | 14.67 | 13.25 | 12.13 | 11.67 | 13.57 | 11.99 |
| 94  | 13.22 | 11.52 | 12.25 | 13.71 | 14.70 | 14.58 | 13.11 | 11.90 | 11.09 | 13.00 | 10.85 |
| 95  | 13.25 | 11.40 | 12.85 | 13.70 | 14.70 | 14.50 | 13.02 | 11.72 | 10.95 | 12.86 | 10.92 |
| 96  | 12.94 | 10.16 | 12.03 | 13.39 | 14.70 | 14.42 | 12.92 | 11.28 | 9.86  | 12.57 | 9.17  |
| 97  | 12.71 | 9.80  | 10.99 | 13.17 | 14.66 | 14.37 | 12.77 | 10.84 | 9.45  | 12.17 | 9.03  |
| 98  | 11.83 | 9.42  | 10.03 | 12.48 | 14.20 | 14.28 | 12.59 | 10.55 | 9.35  | 11.31 | 8.90  |
| 99  | 11.21 | 9.31  | 10.26 | 12.03 | 14.20 | 14.21 | 12.40 | 10.38 | 9.46  | 10.78 | 9.21  |
| 100 | 11.06 | 9.53  | 10.67 | 11.87 | 14.01 | 14.13 | 12.23 | 10.28 | 9.49  | 10.93 | 9.48  |
| 101 | 11.13 | 9.93  | 10.64 | 11.89 | 13.88 | 14.04 | 12.04 | 10.31 | 9.81  | 11.28 | 10.01 |
| 102 | 11.27 | 10.22 | 10.95 | 11.82 | 13.50 | 13.91 | 11.88 | 10.34 | 10.09 | 11.30 | 10.16 |
| 103 | 11.19 | 9.94  | 10.16 | 11.60 | 13.43 | 13.79 | 11.76 | 10.32 | 9.76  | 11.27 | 9.64  |
| 104 | 10.95 | 9.96  | 10.71 | 11.50 | 13.30 | 13.66 | 11.63 | 10.28 | 9.95  | 11.02 | 9.94  |
| 105 | 10.94 | 9.54  | 9.95  | 11.29 | 13.11 | 13.53 | 11.55 | 10.12 | 9.32  | 11.17 | 9.17  |
| 106 | 11.21 | 9.92  | 10.97 | 11.42 | 12.80 | 13.40 | 11.44 | 10.04 | 9.67  | 11.06 | 9.99  |
| 107 | 11.34 | 10.26 | 11.37 | 11.58 | 12.80 | 13.25 | 11.35 | 10.14 | 10.03 | 11.31 | 10.31 |
| 108 | 11.68 | 10.44 | 12.44 | 11.94 | 12.80 | 13.13 | 11.27 | 10.16 | 10.00 | 12.00 | 10.66 |
| 109 | 12.13 | 10.17 | 10.85 | 11.98 | 12.65 | 13.00 | 11.19 | 10.07 | 9.50  | 12.65 | 10.01 |
| 110 | 11.52 | 9.92  | 10.56 | 11.64 | 12.60 | 12.87 | 11.10 | 10.00 | 9.59  | 11.80 | 9.93  |
| 111 | 11.27 | 10.08 | 10.93 | 11.53 | 12.60 | 12.75 | 11.05 | 10.02 | 9.77  | 11.33 | 10.15 |
| 112 | 11.53 | 10.24 | 10.89 | 11.65 | 12.60 | 12.67 | 10.99 | 10.01 | 9.90  | 11.37 | 10.26 |
| 113 | 11.32 | 10.15 | 10.64 | 11.42 | 12.60 | 12.53 | 10.91 | 10.01 | 9.80  | 11.01 | 10.07 |
| 114 | 11.66 | 10.62 | 11.38 | 11.62 | 12.60 | 12.42 | 10.88 | 10.13 | 10.18 | 11.25 | 10.58 |
| 115 | 11.75 | 10.66 | 11.50 | 11.65 | 12.12 | 12.33 | 10.82 | 10.22 | 10.30 | 11.45 | 10.79 |
| 116 | 11.86 | 11.04 | 11.63 | 11.78 | 12.10 | 12.24 | 10.80 | 10.35 | 10.76 | 11.82 | 11.41 |
| 117 | 11.99 | 11.47 | 12.22 | 11.95 | 12.10 | 12.18 | 10.81 | 10.60 | 11.13 | 12.12 | 11.97 |
| 118 | 12.42 | 11.86 | 12.50 | 12.23 | 12.10 | 12.10 | 10.83 | 10.83 | 11.25 | 12.53 | 12.15 |
| 119 | 12.77 | 11.39 | 12.27 | 12.37 | 12.25 | 12.06 | 10.90 | 10.75 | 10.65 | 12.69 | 11.22 |
| 120 | 12.44 | 10.92 | 12.17 | 12.48 | 12.56 | 11.99 | 10.90 | 10.58 | 10.34 | 12.38 | 11.02 |
| 121 | 12.07 | 10.70 | 11.36 | 12.32 | 12.60 | 11.91 | 10.90 | 10.49 | 10.26 | 12.38 | 10.80 |
| 122 | 11.60 | 9.92  | 11.47 | 11.99 | 12.60 | 11.90 | 10.90 | 10.21 | 9.52  | 11.74 | 9.57  |
| 123 | 12.08 | 10.17 | 12.84 | 12.48 | 12.60 | 11.85 | 10.85 | 10.03 | 9.55  | 11.65 | 10.04 |
| 124 | 12.17 | 9.83  | 11.71 | 12.50 | 12.60 | 11.80 | 10.80 | 9.77  | 8.97  | 11.86 | 9.58  |
| 125 | 11.82 | 9.11  | 10.77 | 12.22 | 12.60 | 11.88 | 10.81 | 9.60  | 8.73  | 11.63 | 8.83  |
| 126 | 11.51 | 8.94  | 10.04 | 11.80 | 12.60 | 11.80 | 10.62 | 9.25  | 8.39  | 11.35 | 8.88  |
| 127 | 10.99 | 8.57  | 9.90  | 11.25 | 12.37 | 11.78 | 10.48 | 9.03  | 8.15  | 10.55 | 8.15  |

|     |       |       |       |       |       |       |       |       |       |       |       |
|-----|-------|-------|-------|-------|-------|-------|-------|-------|-------|-------|-------|
| 128 | 10.84 | 9.01  | 10.34 | 11.28 | 12.10 | 11.74 | 10.35 | 8.98  | 8.56  | 10.68 | 9.11  |
| 129 | 10.95 | 9.61  | 11.89 | 11.51 | 12.10 | 11.70 | 10.25 | 9.13  | 9.09  | 10.90 | 9.95  |
| 130 | 11.44 | 9.98  | 11.79 | 11.86 | 12.10 | 11.68 | 10.16 | 9.25  | 9.40  | 11.86 | 10.54 |
| 131 | 11.68 | 10.57 | 11.93 | 11.94 | 12.10 | 11.61 | 10.10 | 9.56  | 10.10 | 11.97 | 11.33 |
| 132 | 11.69 | 9.85  | 10.67 | 11.55 | 12.10 | 11.59 | 10.10 | 9.58  | 9.43  | 11.78 | 10.09 |
| 133 | 11.33 | 9.71  | 11.14 | 11.59 | 12.10 | 11.50 | 10.10 | 9.46  | 9.19  | 11.95 | 10.18 |
| 134 | 11.26 | 10.70 | 12.68 | 11.98 | 12.05 | 11.47 | 10.07 | 9.63  | 10.08 | 11.94 | 11.35 |
| 135 | 12.14 | 11.18 | 12.13 | 12.18 | 12.07 | 11.40 | 10.09 | 9.88  | 10.35 | 12.57 | 11.75 |
| 136 | 12.59 | 10.86 | 11.42 | 12.02 | 12.10 | 11.35 | 10.10 | 9.94  | 10.10 | 12.41 | 10.94 |
| 137 | 12.54 | 10.88 | 11.70 | 12.03 | 12.10 | 11.30 | 10.10 | 9.96  | 10.15 | 12.14 | 11.06 |
| 138 | 12.49 | 11.20 | 12.30 | 12.14 | 12.10 | 11.30 | 10.13 | 10.13 | 10.55 | 12.19 | 11.51 |
| 139 | 12.65 | 11.70 | 13.10 | 12.50 | 12.10 | 11.27 | 10.20 | 10.33 | 10.94 | 12.43 | 12.15 |
| 140 | 12.98 | 11.60 | 13.25 | 12.74 | 12.10 | 11.23 | 10.25 | 10.39 | 10.68 | 12.61 | 11.96 |
| 141 | 13.12 | 12.33 | 13.85 | 13.22 | 12.10 | 11.23 | 10.30 | 10.60 | 11.42 | 13.19 | 13.23 |
| 142 | 13.35 | 11.80 | 12.30 | 12.83 | 12.18 | 11.20 | 10.39 | 10.71 | 11.04 | 13.14 | 11.85 |
| 143 | 13.06 | 11.11 | 11.84 | 12.49 | 12.50 | 11.20 | 10.46 | 10.59 | 10.48 | 12.45 | 10.97 |
| 144 | 12.86 | 10.81 | 12.67 | 12.50 | 12.60 | 11.20 | 10.50 | 10.38 | 10.03 | 12.42 | 10.84 |
| 145 | 13.11 | 10.60 | 12.65 | 12.74 | 12.60 | 11.23 | 10.50 | 10.08 | 9.43  | 13.20 | 10.79 |
| 146 | 13.42 | 10.66 | 12.75 | 12.91 | 12.60 | 11.29 | 10.50 | 9.83  | 9.23  | 13.39 | 10.90 |
| 147 | 13.35 | 11.17 | 12.90 | 13.05 | 12.60 | 11.30 | 10.48 | 9.91  | 9.97  | 13.28 | 11.61 |
| 148 | 13.40 | 11.19 | 12.08 | 12.77 | 12.60 | 11.30 | 10.42 | 10.04 | 10.25 | 12.86 | 11.42 |
| 149 | 13.09 | 11.23 | 12.08 | 12.54 | 12.60 | 11.37 | 10.40 | 10.22 | 10.53 | 12.57 | 11.57 |
| 150 | 12.85 | 11.53 | 12.69 | 12.61 | 12.60 | 11.40 | 10.42 | 10.40 | 10.80 | 12.58 | 11.93 |

**Table S4:** The moisture content (% w/w) of the grain samples at various points within the top, middle, and bottom levels of the silo, measured at 30-day intervals over a period of 150 days.

[illegible]

|              |     |      |      |      |      |      |      |      |      |      |      |      |
|--------------|-----|------|------|------|------|------|------|------|------|------|------|------|
| Bottom-level | 30  | 7.81 | 7.91 | 7.68 | 7.74 | 7.61 | 7.72 | 7.48 | 7.89 | 7.87 | 7.78 | 7.82 |
|              | 60  | 7.83 | 7.66 | 8.15 | 7.89 | 7.76 | 7.53 | 7.75 | 7.62 | 7.86 | 7.63 | 7.80 |
|              | 90  | 8.24 | 7.65 | 7.91 | 8.16 | 8.26 | 7.68 | 7.95 | 7.69 | 7.77 | 7.75 | 7.87 |
|              | 120 | 8.40 | 8.20 | 7.87 | 7.74 | 7.80 | 7.75 | 7.88 | 7.77 | 7.91 | 7.77 | 7.94 |
|              | 150 | 8.35 | 7.72 | 7.80 | 7.90 | 7.92 | 8.06 | 8.19 | 7.83 | 7.76 | 7.68 | 7.63 |
